# Supplementary material for: Molecular architecture of the 90S small subunit pre-ribosome
Source: eLife. 2017 Feb 28;6:e22086. doi: 10.7554/eLife.22086 (PMC5354517; doi:10.7554/eLife.22086)
Supplement: Supplementary file 2. — Sheet one stores the crosslinked peptides. Sheet two shows the annotated intermolecular crosslinks. Sheet three shows the intramolecular crosslinks. The structural consistency for crosslinks between two assigned proteins is judged by the distance (<30 Å) between crosslinked sites. If a crosslinked site is unmodeled or undetermined in structure, the position of neighboring residues or domains is considered. DOI: http://dx.doi.org/10.7554/eLife.22086.029 [file elife-22086-supp2.xlsx]

## Sheet: Raw data
Protein1-Protein2	Peptide1-Peptide2	#Spec-Total	Best E-value
Inter-Molecular
Q06506|RRP9_YEAST(350)-P0CX31|RS24A_YEAST(11),Q06506|RRP9_YEAST(350)-P0CX32|RS24B_YEAST(11)	TAMLWKIPDETR(6)-KVISNPLLAR(1), DRTAMLWKIPDETR(8)-KVISNPLLAR(1), TAMLWKIPDETR(6)-TRKVISNPLLAR(3)	312	6.4e-23
Q06631|BFR2_YEAST(273)-P40079|LCP5_YEAST(88)	SLKELYQETNSLDSELKEYR(3)-LDDECKDPSAMDAR(6), SLKELYQETNSLDSELK(3)-LDDECKDPSAMDAR(6)	270	8.37e-19
P06367|RS14A_YEAST(92)-P25586|KRR1_YEAST(102),P39516|RS14B_YEAST(93)-P25586|KRR1_YEAST(102)	TKTPGPGGQAALR(2)-ARDLIKLLAR(6), TKTPGPGGQAALR(2)-DLIKLLAR(4)	233	3.57e-10
P25635|PWP2_YEAST(27)-Q06078|UTP21_YEAST(730)	QGNITFSDDGKQLLSPVGNR(11)-SKMNTLLHLDVIR(2)	208	7.21e-32
P0CX31|RS24A_YEAST(21)-Q06506|RRP9_YEAST(122),P0CX32|RS24B_YEAST(21)-Q06506|RRP9_YEAST(122)	KQFVVDVLHPNR(1)-LKEDVAEQQGR(2)	160	5.47e-23
P15646|FBRL_YEAST(299)-P34247|UTP11_YEAST(142)	IKPLEQLTLEPYER(2)-EKMNEFTPEK(2)	152	9.4e-19
P40362|UTP18_YEAST(219)-Q06078|UTP21_YEAST(288)	ILSTTYNYKDTLSNSK(9)-IHVLKNIHR(5)	145	5.4e-16
P38911|FKBP3_YEAST(48)-P0C0W1|RS22A_YEAST(82),P38911|FKBP3_YEAST(48)-Q3E7Y3|RS22B_YEAST(82)	ITMAALNPEAIDEENKPSTLR(16)-FNVKIGDIEK(4)	137	1.34e-12
Q06078|UTP21_YEAST(661)-P25635|PWP2_YEAST(85)	AQFKTVSTR(4)-AILVNFKAR(7)	128	6.74e-15
Q06287|NEP1_YEAST(213)-Q12136|SAS10_YEAST(435)	GKDNFADEYVDEK(2)-FKGDDDIPYKER(2)	115	2.44e-17
P53254|UTP22_YEAST(1205)-P25368|RRP7_YEAST(2)	VNLDCNVKPVDDENVILNK(8)-GIEDISAMK(1)	92	7.09e-16
P40055|UTP7_YEAST(307)-Q04500|UTP14_YEAST(824)	NFKQLHSVESLPTPGTNVSISDTGLLALSR(3)-DKNLQNVIINEK(2)	89	7.08e-16
Q12460|NOP56_YEAST(32)-P15646|FBRL_YEAST(299)	LKEVQEQINDFGAFTK(2)-IKPLEQLTLEPYER(2)	88	6.61e-31
P40055|UTP7_YEAST(478)-P33750|DCA13_YEAST(449)	AKTNSDIPDVKPDVK(2)-KDMPYISER(1)	88	1.28e-15
Q06506|RRP9_YEAST(350)-P0CX35|RS4A_YEAST(245),Q06506|RRP9_YEAST(350)-P0CX36|RS4B_YEAST(245)	TAMLWKIPDETR(6)-GIKLSIAEER(3), DRTAMLWKIPDETR(8)-GIKLSIAEER(3)	72	5.67e-12
P0CX31|RS24A_YEAST(49)-Q06506|RRP9_YEAST(122),P0CX32|RS24B_YEAST(49)-Q06506|RRP9_YEAST(122)	LAEVYKAEKDAVSVFGFR(6)-LKEDVAEQQGR(2), LAEVYKAEK(6)-LKEDVAEQQGR(2), EKLAEVYKAEK(8)-LKEDVAEQQGR(2)	69	2.37e-18
P25635|PWP2_YEAST(85)-Q06078|UTP21_YEAST(9)	AILVNFKAR(7)-KVEEDVR(1)	67	1.71e-11
Q06287|NEP1_YEAST(213)-Q99207|NOP14_YEAST(74)	GKDNFADEYVDEK(2)-DGLPSKTADR(6)	66	9.55e-06
P33322|CBF5_YEAST(180)-Q6Q547|NOP10_YEAST(18)	TIYESNLIEFDNKR(13)-IYTLKK(5)	62	7.61e-14
P42945|UTP10_YEAST(1754)-P35194|UTP20_YEAST(27)	TGLVKVVENVLGEPFDR(5)-IDDLKIEPAR(5)	62	3.53e-09
P25586|KRR1_YEAST(87)-P39516|RS14B_YEAST(2)	KTYDPAIILK(1)-ANDLVQAR(1)	57	3.89e-14
P0C0W1|RS22A_YEAST(36)-P26786|RS7A_YEAST(148),P0C0W1|RS22A_YEAST(36)-P48164|RS7B_YEAST(148),Q3E7Y3|RS22B_YEAST(36)-P26786|RS7A_YEAST(148),Q3E7Y3|RS22B_YEAST(36)-P48164|RS7B_YEAST(148)	VIIKFLQVMQK(4)-YLVGGNKIQK(7)	53	2.12e-06
P25368|RRP7_YEAST(255)-P05756|RS13_YEAST(100)	KDFYR(1)-KHLER(1)	48	9.32e-12
Q06078|UTP21_YEAST(661)-P25635|PWP2_YEAST(129)	AQFKTVSTR(4)-TPDVNKDR(6)	47	1.21e-14
P05756|RS13_YEAST(43)-P25368|RRP7_YEAST(255)	KGLTPSQIGVLLR(1)-KDFYR(1)	45	2.65e-08
P34247|UTP11_YEAST(2)-P0CX29|RS23A_YEAST(70),P34247|UTP11_YEAST(2)-P0CX30|RS23B_YEAST(70)	AKLVHDVQK(1)-KCVR(1), AKLVHDVQKK(1)-KCVR(1)	39	9.35e-07
P0C0W1|RS22A_YEAST(71)-P40546|FAF1_YEAST(307),Q3E7Y3|RS22B_YEAST(71)-P40546|FAF1_YEAST(307)	LNKCGVISPR(3)-GLKISSVGR(3)	37	6.54e-10
Q06631|BFR2_YEAST(316)-P40079|LCP5_YEAST(116)	FKAINLPADVQVENQLSDMSR(2)-KLAYQLDK(1)	35	1.37e-15
Q06078|UTP21_YEAST(533)-P0CX51|RS16A_YEAST(107),Q06078|UTP21_YEAST(533)-P0CX52|RS16B_YEAST(107)	MVSCGLDGIVGFYDFNKSTLLGK(17)-KAFTSYDR(1)	35	2e-13
P42945|UTP10_YEAST(271)-Q06078|UTP21_YEAST(245)	SKDCQIAAHTILVVFATALPLKK(22)-TIKIPQSR(3), DCQIAAHTILVVFATALPLKK(20)-TIKIPQSR(3)	33	2.46e-25
Q04305|UTP15_YEAST(244)-Q06287|NEP1_YEAST(2)	KLYER(1)-VEDSR(1)	33	3.47e-11
Q04305|UTP15_YEAST(243)-Q06287|NEP1_YEAST(2)	VWDLTSNKK(8)-VEDSR(1)	33	2.03e-08
Q06506|RRP9_YEAST(114)-P0CX31|RS24A_YEAST(11),Q06506|RRP9_YEAST(114)-P0CX32|RS24B_YEAST(11)	TIDEYNNFDAGDLDKDIIASR(15)-KVISNPLLAR(1)	30	2.48e-06
P34247|UTP11_YEAST(3)-P0CX29|RS23A_YEAST(70),P34247|UTP11_YEAST(3)-P0CX30|RS23B_YEAST(70)	AKLVHDVQKK(2)-KCVR(1), AKLVHDVQK(2)-KCVR(1)	28	4.7e-08
Q06679|UTP4_YEAST(316)-P40362|UTP18_YEAST(418),Q06679|UTP4_YEAST(316)-Q08492|BUD21_YEAST(175)	SQKNNR(3)-GKFR(2)	26	0.000177
P25586|KRR1_YEAST(127)-P06367|RS14A_YEAST(92),P25586|KRR1_YEAST(127)-P39516|RS14B_YEAST(93)	ILQDDMACDVIKIGNFVTNK(12)-TKTPGPGGQAALR(2)	25	1.77e-20
P0CX37|RS6A_YEAST(131)-P35194|UTP20_YEAST(643),P0CX38|RS6B_YEAST(131)-P35194|UTP20_YEAST(643)	KGEQELEGLTDTTVPKR(16)-IKNVGAEFGK(2)	25	4.21e-14
P23248|RS3A2_YEAST(33)-P53254|UTP22_YEAST(732),P33442|RS3A1_YEAST(33)-P53254|UTP22_YEAST(732)	EWFDIKAPSTFENR(6)-KSFDDLYK(1), KEWFDIKAPSTFENR(7)-KSFDDLYK(1)	25	1e-11
P05756|RS13_YEAST(27)-P26786|RS7A_YEAST(76),P05756|RS13_YEAST(27)-P48164|RS7B_YEAST(76)	NAPAWFKLSSESVIEQIVK(7)-VQTKLTR(4)	25	4.77e-06
P34247|UTP11_YEAST(75)-Q08965|BMS1_YEAST(1075)	KTDAKGLLISSR(5)-AVQKELPFK(4)	24	9.33e-12
Q04177|UTP5_YEAST(473)-Q06287|NEP1_YEAST(2)	LKPALAVILLER(2)-VEDSR(1)	23	1.9e-05
Q05498|FCF1_YEAST(133)-P15646|FBRL_YEAST(299)	LSCSHKGTYADDCLVHR(6)-IKPLEQLTLEPYER(2)	22	5.79e-18
P0CX51|RS16A_YEAST(140)-P0C0X0|RS28B_YEAST(14),P0CX51|RS16A_YEAST(140)-Q3E7X9|RS28A_YEAST(14),P0CX52|RS16B_YEAST(140)-P0C0X0|RS28B_YEAST(14),P0CX52|RS16B_YEAST(140)-Q3E7X9|RS28A_YEAST(14)	FQKSYR(3)-VIKVLGR(3)	22	4.25e-07
Q06287|NEP1_YEAST(177)-P26783|RS5_YEAST(213)	KVTLSFDAPVIR(1)-KKDELER(1)	21	2.42e-11
P0CX43|RL1A_YEAST(39)-P39969|BOI2_YEAST(855),P0CX44|RL1B_YEAST(39)-P39969|BOI2_YEAST(855)	NFLETVELQVGLKNYDPQR(13)-KGLTFTQPR(1)	19	4.94e-08
P11484|HSP75_YEAST(58)-P32589|HSP7F_YEAST(273),P40150|HSP76_YEAST(58)-P32589|HSP7F_YEAST(273)	LIGDAAKNQAALNPR(7)-ILTAAEKLK(7)	17	1.43e-07
Q06679|UTP4_YEAST(561)-P42945|UTP10_YEAST(644)	ISKPLAR(3)-ILTPKR(5)	17	8.19e-07
P16862|K6PF2_YEAST(548)-Q08965|BMS1_YEAST(1075)	AVAEAIQAKDFK(9)-AVQKELPFK(4)	17	5.95e-05
P25586|KRR1_YEAST(312)-P48234|NOL10_YEAST(169)	AKDFIAPEEEAYKPNQN(13)-LNLEKGR(5)	17	0.000867
P0CX35|RS4A_YEAST(62)-P0CX31|RS24A_YEAST(84),P0CX35|RS4A_YEAST(62)-P0CX32|RS24B_YEAST(84),P0CX36|RS4B_YEAST(62)-P0CX31|RS24A_YEAST(84),P0CX36|RS4B_YEAST(62)-P0CX32|RS24B_YEAST(84)	EVKAILMQR(3)-KFEPTYR(1)	16	2.8e-16
P23248|RS3A2_YEAST(219)-P53254|UTP22_YEAST(1007),P33442|RS3A1_YEAST(219)-P53254|UTP22_YEAST(1007)	LLKQPK(3)-KLSER(1)	15	3.91e-06
P38249|EIF3A_YEAST(63)-Q03280|TOM1_YEAST(1159)	FLEIGVELKK(9)-SDSLFKTQSR(6)	15	0.000577
O13516|RS9A_YEAST(51)-P40079|LCP5_YEAST(333),P05755|RS9B_YEAST(51)-P40079|LCP5_YEAST(333)	ISFQLSKIR(7)-KLEDSTSR(1)	13	1.84e-06
Q12035|FCF2_YEAST(22)-Q02354|UTP6_YEAST(431)	DASASLEVKNSAK(9)-YKILDLIISK(2)	11	1.52e-10
Q04500|UTP14_YEAST(266)-P35194|UTP20_YEAST(2059)	GKSSTYEVPLPQR(2)-LEKQFK(3)	11	0.000667
Q06679|UTP4_YEAST(217)-P15646|FBRL_YEAST(229)	IWSAQKNDENMGR(6)-HPQKYR(4)	10	3e-06
Q06506|RRP9_YEAST(114)-P0CX35|RS4A_YEAST(53),Q06506|RRP9_YEAST(114)-P0CX36|RS4B_YEAST(53)	TIDEYNNFDAGDLDKDIIASR(15)-LKYALNGR(2)	10	0.000103
P33750|DCA13_YEAST(143)-P26786|RS7A_YEAST(148),P33750|DCA13_YEAST(143)-P48164|RS7B_YEAST(148)	SQNFMLSCSDDKTVK(12)-YLVGGNKIQK(7)	10	0.000146
P0CX37|RS6A_YEAST(214)-P0CX35|RS4A_YEAST(168),P0CX37|RS6A_YEAST(214)-P0CX36|RS4B_YEAST(168),P0CX38|RS6B_YEAST(214)-P0CX35|RS4A_YEAST(168),P0CX38|RS6B_YEAST(214)-P0CX36|RS4B_YEAST(168)	EAAAEYAQLLAKR(12)-IDLASGKITDFIK(7)	9	1.57e-11
Q02354|UTP6_YEAST(65)-Q12035|FCF2_YEAST(75)	YINYESNVNKLR(10)-LETGFDALANKK(11)	9	3.47e-08
Q02354|UTP6_YEAST(290)-Q12460|NOP56_YEAST(164)	HKGYYAISDSK(2)-VKFSVQK(2)	8	3.79e-07
P15646|FBRL_YEAST(299)-Q05498|FCF1_YEAST(35)	IKPLEQLTLEPYER(2)-TKEDPELTR(2)	8	1.37e-06
P15646|FBRL_YEAST(168)-Q05498|FCF1_YEAST(35)	LAAGIMGGLDELFIAPGKK(18)-TKEDPELTR(2)	8	0.000111
Q12035|FCF2_YEAST(125)-P36080|RRP14_YEAST(189)	DLLLIKHR(6)-ISDMKSK(5)	8	0.000126
Q08965|BMS1_YEAST(982)-Q99207|NOP14_YEAST(741)	ALSKPEGHYR(4)-MKAQLKK(2), ALSKPEGHYR(4)-MKAQLK(2)	8	0.000146
Q3E7X9|RS28A_YEAST(4)-P26783|RS5_YEAST(222)	MDNKTPVTLAK(4)-VAKSNR(3)	8	0.000526
Q04500|UTP14_YEAST(800)-Q99216|PNO1_YEAST(144)	VIDDEDDKEVDTTLPGWGEWAGAGSKPK(26)-TNPKFTTDPGALQK(4)	7	5.31e-09
P40470|RRT14_YEAST(148)-P34247|UTP11_YEAST(202)	SWDLEEEVRDELEDIQQSILKDTVSTANTDR(21)-QVKQHLQR(3)	7	6.64e-08
P25635|PWP2_YEAST(27)-Q06078|UTP21_YEAST(766)	QGNITFSDDGKQLLSPVGNR(11)-LPFFLQLSGEKVGDEASVR(11)	7	1.09e-07
P40055|UTP7_YEAST(307)-Q03280|TOM1_YEAST(545)	IWDIRNFKQLHSVESLPTPGTNVSISDTGLLALSR(8)-KILENK(1)	7	1.06e-05
Q12035|FCF2_YEAST(156)-P15646|FBRL_YEAST(121)	FAIGTIIEDKSEFYSSR(10)-NMAPGESVYGEKR(12)	7	1.17e-05
O14455|RL36B_YEAST(1)-P07259|PYR1_YEAST(864)	MAVKTGIAIGLNK(1)-VFAIANAFAKK(10)	7	0.000573
Q99216|PNO1_YEAST(188)-P47108|URB2_YEAST(235)	LDDLYIETFEVKDVK(12)-IDYMKLNKK(5)	7	0.00126
P0CX43|RL1A_YEAST(39)-Q02892|NOG1_YEAST(501),P0CX44|RL1B_YEAST(39)-Q02892|NOG1_YEAST(501)	NFLETVELQVGLKNYDPQR(13)-QKTMIAEAR(2)	6	5.44e-07
P41810|COPB_YEAST(659)-Q06511|RRP15_YEAST(1)	LLEVAFLDTTKSSFKR(15)-MGSKHRVDTK(1)	6	5.93e-07
Q06506|RRP9_YEAST(534)-P0CX82|RL19A_YEAST(2),Q06506|RRP9_YEAST(534)-P0CX83|RL19B_YEAST(2),Q06506|RRP9_YEAST(534)-P41812|POP1_YEAST(322)	IQVVESGKHGKEK(11)-ANLR(1)	6	8.08e-05
O13516|RS9A_YEAST(91)-P36144|RL1D1_YEAST(15),P05755|RS9B_YEAST(91)-P36144|RL1D1_YEAST(15)	VGVLSEDKKK(9)-SGLAEKALK(6)	6	0.000193
Q12220|UTP12_YEAST(513)-P53261|PESC_YEAST(418)	FWDFKVENSLVPGTKNK(15)-PVLKNK(4)	6	0.000663
Q08492|BUD21_YEAST(123)-Q06512|NOC4_YEAST(65)	NIDQKDEGSTQYSSSR(5)-KLFSR(1)	6	0.0014
Q06679|UTP4_YEAST(580)-P06103|EIF3B_YEAST(152)	KSVVVITADNK(1)-LDLKHR(4)	6	0.00156
P0CX31|RS24A_YEAST(11)-P0CX35|RS4A_YEAST(53),P0CX31|RS24A_YEAST(11)-P0CX36|RS4B_YEAST(53),P0CX32|RS24B_YEAST(11)-P0CX35|RS4A_YEAST(53),P0CX32|RS24B_YEAST(11)-P0CX36|RS4B_YEAST(53)	KVISNPLLAR(1)-LKYALNGR(2)	5	3.08e-10
P40055|UTP7_YEAST(476)-P33750|DCA13_YEAST(449)	DLAQTTMDANNKAK(12)-KDMPYISER(1)	5	4.82e-06
P38333|ENP1_YEAST(273)-Q99207|NOP14_YEAST(268)	LFVSNLTAKESQK(9)-TDLDKEYDIK(5)	5	5e-06
P05756|RS13_YEAST(43)-P25368|RRP7_YEAST(244)	KGLTPSQIGVLLR(1)-AKPISNIDKK(2)	5	5.31e-06
Q08096|RCL1_YEAST(32)-Q12389|DBP10_YEAST(919)	IVLATLSGKPIKIEK(12)-GKFKHK(4)	5	9.26e-06
O13516|RS9A_YEAST(91)-P04456|RL25_YEAST(21),P05755|RS9B_YEAST(91)-P04456|RL25_YEAST(21)	VGVLSEDKKK(9)-GTNGKKALK(5)	5	1.57e-05
P38249|EIF3A_YEAST(787)-P40055|UTP7_YEAST(528)	NLVMVYDDYLKFK(11)-NIRKR(4)	5	8.58e-05
P40055|UTP7_YEAST(454)-Q04500|UTP14_YEAST(824)	LPADTITLDPNSIGSVDKR(18)-DKNLQNVIINEK(2)	5	0.000129
P39935|IF4F1_YEAST(762)-P06105|SC160_YEAST(136)	LNLLTGKMMFECFR(7)-IVQSVKK(6)	5	0.000144
Q08492|BUD21_YEAST(188)-P15646|FBRL_YEAST(299)	VQLLSTTQDSKTLPPKK(11)-IKPLEQLTLEPYER(2)	5	0.000195
P25555|GBP2_YEAST(190)-Q06344|ESF1_YEAST(218)	FDGALFMDRKLMVR(10)-KKTDDSDSDMDIGIK(1)	5	0.000292
P48234|NOL10_YEAST(4)-P53914|KRE33_YEAST(919)	VLKSTSANDVSVYQVSGTNVSR(3)-KMSQYFR(1)	4	1.09e-08
P36144|RL1D1_YEAST(89)-P0CX55|RS18A_YEAST(48),P36144|RL1D1_YEAST(89)-P0CX56|RS18B_YEAST(48)	ETLTKDEHTSELFK(5)-YSNLVCKK(7)	4	9.58e-08
P36144|RL1D1_YEAST(170)-Q04305|UTP15_YEAST(341)	QQMVEKCDPIYVR(6)-SSDKENAPASFNK(4)	4	2e-07
Q08096|RCL1_YEAST(250)-P40546|FAF1_YEAST(128)	SPGWGITLVAQSKQK(13)-TLTQINKK(7)	4	3.08e-06
Q04217|DHR1_YEAST(506)-P31539|HS104_YEAST(778)	EMMHDFKLTK(7)-KAIHK(1)	4	8.04e-06
P53254|UTP22_YEAST(745)-P40055|UTP7_YEAST(518)	IIFQMKLPLSVK(6)-VQKQLDKEK(3)	4	1.47e-05
P0C0W1|RS22A_YEAST(88)-P40079|LCP5_YEAST(333),Q3E7Y3|RS22B_YEAST(88)-P40079|LCP5_YEAST(333)	IGDIEKWTANLLPAR(6)-KLEDSTSR(1)	4	2.68e-05
P05756|RS13_YEAST(107)-P25586|KRR1_YEAST(245)	KDKDAK(1)-NVEKK(4)	4	7.28e-05
Q08096|RCL1_YEAST(32)-P40546|FAF1_YEAST(230)	IVLATLSGKPIKIEK(12)-INKLEK(3)	4	7.93e-05
P15646|FBRL_YEAST(102)-Q12035|FCF2_YEAST(133)	GKEDLLVTK(2)-AALDPKR(6)	4	0.000172
P0CX35|RS4A_YEAST(62)-Q03735|NAB6_YEAST(892),P0CX36|RS4B_YEAST(62)-Q03735|NAB6_YEAST(892)	YALNGREVKAILMQR(9)-LEEKRR(4)	4	0.000305
P20484|MAK11_YEAST(334)-Q00416|SEN1_YEAST(1947)	VEENEKQEDDDDK(6)-NNKKAESPSTSSGTK(3)	4	0.000398
Q08096|RCL1_YEAST(32)-Q06631|BFR2_YEAST(424)	IVLATLSGKPIKIEK(12)-VLLNDLIDKK(9)	4	0.000401
Q06679|UTP4_YEAST(316)-Q12389|DBP10_YEAST(155)	SQKNNR(3)-KGFR(1)	4	0.000494
Q12035|FCF2_YEAST(125)-Q08965|BMS1_YEAST(1128)	DLLLIKHR(6)-KEQK(1)	4	0.000722
P15646|FBRL_YEAST(212)-Q12460|NOP56_YEAST(164)	ELISMAKK(7)-VKFSVQK(2)	4	0.00151
Q08096|RCL1_YEAST(29)-P32505|NAB2_YEAST(427)	IVLATLSGKPIK(9)-RCKYR(3)	4	0.00235
Q08162|RRP44_YEAST(702)-P35194|UTP20_YEAST(1596)	LEAGALNLASPEVKVHMDSETSDPNEVEIKK(14)-QELYPTLSKILGTR(9)	4	0.00318
Q12149|RRP6_YEAST(559)-Q04660|ERB1_YEAST(1)	FSVLCNSNISKSR(11)-MMAKNNK(1)	4	0.00411
Q05022|RRP5_YEAST(1650)-Q06287|NEP1_YEAST(39)	SLFEGLVADAPKR(12)-ITKR(3)	4	0.00426
Q05498|FCF1_YEAST(93)-O13516|RS9A_YEAST(92),Q05498|FCF1_YEAST(93)-P05755|RS9B_YEAST(92)	GMMDCLLAKCNPLITDCVMAELEK(9)-KLDYVLALK(1)	3	7.54e-14
Q08096|RCL1_YEAST(46)-Q08965|BMS1_YEAST(602)	SGDLNPGLKDYEVSFLR(9)-EGNKDHAVDLEK(4)	3	1.41e-07
Q12220|UTP12_YEAST(740)-Q06287|NEP1_YEAST(213)	ADASGEGVEDEASGVHKQTLESLK(17)-GKDNFADEYVDEK(2)	3	3.49e-06
P40079|LCP5_YEAST(331)-O13516|RS9A_YEAST(51),P40079|LCP5_YEAST(331)-P05755|RS9B_YEAST(51)	MNVIGGEDFGIFSSKR(15)-ISFQLSKIR(7)	3	3.81e-06
Q05022|RRP5_YEAST(1650)-P20459|IF2A_YEAST(61)	SLFEGLVADAPKR(12)-SIQKLIRVGK(4)	3	4.41e-06
P35194|UTP20_YEAST(1245)-P0CX39|RS8A_YEAST(142),P35194|UTP20_YEAST(1245)-P0CX40|RS8B_YEAST(142)	ILKILK(3)-KWAAR(1)	3	7.02e-06
P47083|MPP10_YEAST(295)-P41810|COPB_YEAST(363)	LDLFADEEDEPNAEGVGEASDKNLSSFEK(22)-KELQTTVNNPDQDK(1)	3	1.93e-05
Q08096|RCL1_YEAST(32)-Q99207|NOP14_YEAST(115)	IVLATLSGKPIKIEK(12)-GGVIDKR(6)	3	2.59e-05
P25635|PWP2_YEAST(123)-Q06078|UTP21_YEAST(9)	FLQIWKTPDVNKDR(6)-KVEEDVR(1)	3	3.03e-05
P53276|UTP8_YEAST(700)-Q06679|UTP4_YEAST(371)	GFQHGFASSTFDNGTSQKR(18)-KMPTVEPYSK(1)	3	6.06e-05
P34247|UTP11_YEAST(71)-Q08965|BMS1_YEAST(1075)	KTDAKGLLISSR(1)-AVQKELPFK(4)	3	6.32e-05
P0CX43|RL1A_YEAST(39)-P34241|URB1_YEAST(957),P0CX44|RL1B_YEAST(39)-P34241|URB1_YEAST(957)	NFLETVELQVGLKNYDPQR(13)-LFNEGKTIK(6)	3	6.99e-05
P40362|UTP18_YEAST(219)-P42945|UTP10_YEAST(249)	ILSTTYNYKDTLSNSK(9)-LLASKSK(5)	3	8.82e-05
Q99207|NOP14_YEAST(465)-P35194|UTP20_YEAST(1940)	SLSEKYNR(5)-KVLNIIK(1)	3	8.88e-05
P0CX37|RS6A_YEAST(214)-P02994|EF1A_YEAST(316),P0CX38|RS6B_YEAST(214)-P02994|EF1A_YEAST(316)	EAAAEYAQLLAKR(12)-NVSVKEIR(5)	3	0.00012
P25635|PWP2_YEAST(129)-Q06078|UTP21_YEAST(9)	TPDVNKDR(6)-KVEEDVR(1)	3	0.000309
Q12136|SAS10_YEAST(595)-P15646|FBRL_YEAST(102)	AVYSGGQSGVYEGEKTGIK(15)-GKEDLLVTK(2), AVYSGGQSGVYEGEKTGIKK(15)-GKEDLLVTK(2)	3	0.000425
P35194|UTP20_YEAST(1646)-P0CX47|RS11A_YEAST(102),P35194|UTP20_YEAST(1646)-P0CX48|RS11B_YEAST(102)	SKSEELRDAVR(2)-YEKR(3)	3	0.000426
P06103|EIF3B_YEAST(152)-P39730|IF2P_YEAST(246)	LDLKHR(4)-KLLER(1)	3	0.000576
P53254|UTP22_YEAST(1018)-P25368|RRP7_YEAST(292)	LTLAQYKGIQMNFTNLR(7)-KFNPYT(1)	3	0.000669
Q08096|RCL1_YEAST(32)-P0C0W9|RL11A_YEAST(13),Q08096|RCL1_YEAST(32)-Q3E757|RL11B_YEAST(13)	IVLATLSGKPIKIEK(12)-DLKIEK(3)	3	0.00181
P35194|UTP20_YEAST(957)-P40525|RL34B_YEAST(1),P35194|UTP20_YEAST(957)-P87262|RL34A_YEAST(1)	KIAVISVLPNFKK(12)-MAQR(1)	3	0.00223
Q12136|SAS10_YEAST(524)-Q08965|BMS1_YEAST(836)	EGKLAELAENVSGDGKR(3)-WHKK(3)	3	0.00236
Q05022|RRP5_YEAST(441)-P14020|DPM1_YEAST(15)	STEGLDAFPIGYTFESCSIKGR(20)-MSIEYSVIVPAYHEKLNIK(15)	3	0.00258
P38249|EIF3A_YEAST(196)-P20435|RPAB2_YEAST(70)	KNEFK(1)-TLKEK(3)	3	0.00351
P42945|UTP10_YEAST(1754)-P35194|UTP20_YEAST(36)	TGLVKVVENVLGEPFDR(5)-NLEKR(4)	3	0.00386
P48164|RS7B_YEAST(138)-Q12099|FAL1_YEAST(158)	VLEDMVFPTEIVGKR(14)-VLDMIKK(6)	2	6.69e-10
P40993|RMRP_YEAST(100)-P53833|POP3_YEAST(137)	KCIQVNCLNCEK(1)-SVSKYGMLLLR(4)	2	1.46e-08
P15646|FBRL_YEAST(168)-Q04177|UTP5_YEAST(419)	LAAGIMGGLDELFIAPGKK(18)-ISGKK(4)	2	5.33e-08
Q05022|RRP5_YEAST(708)-P0CX51|RS16A_YEAST(14),Q05022|RRP5_YEAST(708)-P0CX52|RS16B_YEAST(14)	TKDSVIVEIPDVGLR(2)-KSATAVAHVK(1)	2	1.14e-07
Q05022|RRP5_YEAST(1650)-P34241|URB1_YEAST(965)	SLFEGLVADAPKR(12)-ISLVKNILNK(5)	2	1.56e-06
Q08965|BMS1_YEAST(231)-Q04119|PPN1_YEAST(2)	FISVMKFR(6)-VVVGKSEVR(1)	2	4.78e-05
P47083|MPP10_YEAST(459)-P32899|IMP3_YEAST(73)	LDVLSSVHFVPKPASTSLEIR(12)-KHEQLLLDK(1)	2	5.52e-05
P0CX47|RS11A_YEAST(141)-P0CX35|RS4A_YEAST(198),P0CX47|RS11A_YEAST(141)-P0CX36|RS4B_YEAST(198),P0CX48|RS11B_YEAST(141)-P0CX35|RS4A_YEAST(198),P0CX48|RS11B_YEAST(141)-P0CX36|RS4B_YEAST(198)	FNVVKVSAAAGK(5)-IGTIVHKER(7)	2	6.06e-05
P34247|UTP11_YEAST(150)-P15646|FBRL_YEAST(299)	MNEFTPEKFFNTTSEMVNR(8)-EERIKPLEQLTLEPYER(5)	2	6.29e-05
P33750|DCA13_YEAST(467)-Q07896|NOC3_YEAST(364)	QIVGTVHKYEDSGR(8)-KKDR(2)	2	0.000137
Q03532|HAS1_YEAST(163)-P05759|RS27A_YEAST(48)	LMKGVNMLIATPGR(3)-LIFAGKQLEDGR(6)	2	0.000138
P48234|NOL10_YEAST(2)-P53914|KRE33_YEAST(919)	VLKSTSANDVSVYQVSGTNVSR(1)-KMSQYFR(1)	2	0.000173
P25694|CDC48_YEAST(261)-P53254|UTP22_YEAST(217)	GVLMYGPPGTGKTLMARAVANETGAFFFLINGPEVMSK(12)-KDFLNFRCLHK(1)	2	0.000238
Q06287|NEP1_YEAST(213)-Q12136|SAS10_YEAST(430)	GKDNFADEYVDEK(2)-KTDR(1)	2	0.00029
P38112|MAK5_YEAST(326)-P38712|RRP3_YEAST(199)	FSKVNTLILDEADR(3)-KPHIIIATPGR(1)	2	0.000302
Q05022|RRP5_YEAST(379)-P19882|HSP60_YEAST(28)	TFSEEDLKHK(8)-ELKFGVEGR(3)	2	0.00033
Q08096|RCL1_YEAST(1)-P16521|EF3A_YEAST(620)	MSSSAPKYTTFQGSQNFR(1)-KYKGNFTEFVK(1)	2	0.000374
Q05498|FCF1_YEAST(35)-Q12136|SAS10_YEAST(600)	TKEDPELTR(2)-KGLTR(1)	2	0.000393
P53941|IMP4_YEAST(63)-P32899|IMP3_YEAST(73)	YDQSLKESEEADDLQVDDEYAATSGIMDPR(6)-KHEQLLLDK(1)	2	0.000433
P22147|XRN1_YEAST(76)-P0C2I3|YD15B_YEAST(1046),P22147|XRN1_YEAST(76)-P0C2I6|YL13B_YEAST(1046),P22147|XRN1_YEAST(76)-P0C2I7|YL14B_YEAST(1046),P22147|XRN1_YEAST(76)-P0C2J1|YP14B_YEAST(1046),P22147|XRN1_YEAST(76)-P47098|YJ11B_YEAST(1046),P22147|XRN1_YEAST(76)-Q03434|YM12B_YEAST(1046),P22147|XRN1_YEAST(76)-Q03612|YE11B_YEAST(1046),P22147|XRN1_YEAST(76)-Q12141|YG11B_YEAST(1046),P22147|XRN1_YEAST(76)-Q…	ICTYIDHLFQTIKPK(13)-SKDFR(2)	2	0.000475
P10591|HSP71_YEAST(568)-Q12481|RRP36_YEAST(199)	KAEETISWLDSNTTASK(1)-KFLSKIDQGER(1)	2	0.000579
Q04500|UTP14_YEAST(824)-P40055|UTP7_YEAST(299)	DKNLQNVIINEK(2)-SMKIWDIR(3)	2	0.000715
P20447|DBP3_YEAST(1)-P0CX47|RS11A_YEAST(43),P20447|DBP3_YEAST(1)-P0CX48|RS11B_YEAST(43)	MTKEEIADKK(1)-NAGLGFKTPK(7)	2	0.000736
P34241|URB1_YEAST(1436)-P40498|UTP25_YEAST(28)	ELVKMVK(4)-IKRSSAR(2)	2	0.000807
P12945|NAT1_YEAST(660)-Q08237|REXO4_YEAST(239)	EAAAMNKRK(7)-GKTPSLKK(2)	2	0.000971
P40991|NOP2_YEAST(380)-Q08962|NIP7_YEAST(41)	NTGCVFANDANKSR(12)-LQKDR(3)	2	0.00125
Q06078|UTP21_YEAST(918)-Q12176|MAK21_YEAST(37)	NQDIASALQNWEDVHKKEDR(17)-GKDVK(2)	2	0.00148
Q12754|RRP12_YEAST(457)-P32527|ZUO1_YEAST(126)	SLKIVDTWR(3)-QVVKYHPDK(4)	2	0.00157
P25644|PAT1_YEAST(365)-P36049|EBP2_YEAST(313)	AVTVAKER(6)-KFGK(1)	2	0.00178
P35194|UTP20_YEAST(1596)-P0CX35|RS4A_YEAST(198),P35194|UTP20_YEAST(1596)-P0CX36|RS4B_YEAST(198)	QELYPTLSKILGTR(9)-IGTIVHKER(7)	2	0.00181
Q05022|RRP5_YEAST(441)-P14020|DPM1_YEAST(19)	STEGLDAFPIGYTFESCSIKGR(20)-LNIKPLTTRLFAGMSPEMAK(4)	2	0.0023
P47083|MPP10_YEAST(18)-P38961|RRP8_YEAST(372)	SNAGRIILKDPSATSK(9)-EELEKKR(5)	2	0.0024
Q06287|NEP1_YEAST(164)-Q07915|RLP24_YEAST(125)	VIKNPITDHLPTK(3)-KLVESNPELLR(1)	2	0.00252
P25644|PAT1_YEAST(668)-P05738|RL9A_YEAST(106),P25644|PAT1_YEAST(668)-P51401|RL9B_YEAST(106)	SNILSSPEISTWNEIYDKLFTSLESK(18)-YVYAHFPINVNIVEKDGAK(15)	2	0.00279
Q05946|UTP13_YEAST(751)-P41812|POP1_YEAST(637)	DWNTNAKTHTIAQR(7)-INFEKIK(5)	2	0.0033
P32324|EF2_YEAST(482)-P0CX82|RL19A_YEAST(1),P32324|EF2_YEAST(482)-P0CX83|RL19B_YEAST(1)	VMKFSVSPVVQVAVEVKNANDLPK(3)-MANLR(1)	2	0.00349
Q03690|CLU_YEAST(106)-Q06106|MRD1_YEAST(425)	LQLILKPYSAR(6)-KSHR(1)	2	0.00368
Q02354|UTP6_YEAST(26)-P40055|UTP7_YEAST(20)	GLFTKNEVSLIMK(5)-ENQNKFER(5)	2	0.00378
P40362|UTP18_YEAST(219)-Q04660|ERB1_YEAST(278)	ILSTTYNYKDTLSNSK(9)-VMKIVR(3)	2	0.00386
Q05946|UTP13_YEAST(751)-Q07896|NOC3_YEAST(320)	CRDWNTNAKTHTIAQR(9)-IFNKILK(4)	2	0.00457
P22202|HSP74_YEAST(244)-P09064|IF2B_YEAST(214)	LVNFLAEEFKR(10)-LVIKGK(4)	2	0.00516
P53276|UTP8_YEAST(700)-Q06679|UTP4_YEAST(773)	GFQHGFASSTFDNGTSQKR(18)-AFIQPKLVF(6)	2	0.00693
P0C0W1|RS22A_YEAST(71)-P37838|NOP4_YEAST(212),Q3E7Y3|RS22B_YEAST(71)-P37838|NOP4_YEAST(212)	LNKCGVISPR(3)-DLKIDGR(3)	2	0.00706
P53235|EIF2A_YEAST(426)-Q06078|UTP21_YEAST(9)	ELLKVDWR(4)-KVEEDVR(1)	2	0.00845
Q02931|UTP17_YEAST(740)-P53276|UTP8_YEAST(442)	TGNIALVINQQLTDLDGVPTINYKSR(24)-VKCNDVSGDSSVPVLHCNEVIEK(2)	1	6.61e-06
Q03280|TOM1_YEAST(3170)-P0CX41|RL23A_YEAST(2),Q03280|TOM1_YEAST(3170)-P0CX42|RL23B_YEAST(2)	NNTTYVNYTATCKEVSYFWRAVR(13)-SGNGAQGTKFR(1)	1	1e-05
P0CX37|RS6A_YEAST(214)-Q08235|BRX1_YEAST(271),P0CX38|RS6B_YEAST(214)-Q08235|BRX1_YEAST(271)	EAAAEYAQLLAKR(12)-AEAAVERKIK(8)	1	1.18e-05
P0C0W1|RS22A_YEAST(22)-P26784|RL16A_YEAST(170),Q3E7Y3|RS22B_YEAST(22)-P26784|RL16A_YEAST(170)	SSVLADALNAINNAEKTGKR(19)-VSSAEYYAKKR(9)	1	1.6e-05
Q08096|RCL1_YEAST(29)-Q01080|RPA49_YEAST(103)	IVLATLSGKPIK(9)-VVSKSSKNLR(4)	1	1.95e-05
Q12035|FCF2_YEAST(197)-P34247|UTP11_YEAST(36)	YNEIQEKSTSGR(7)-HKDYVKR(6)	1	2.34e-05
P04147|PABP_YEAST(105)-P05749|RL22A_YEAST(86)	KAIEQLNYTPIKGR(12)-KNQLR(1)	1	2.5e-05
P0CX43|RL1A_YEAST(39)-P47161|VPS70_YEAST(739),P0CX44|RL1B_YEAST(39)-P47161|VPS70_YEAST(739)	NFLETVELQVGLKNYDPQR(13)-LQRSNSKSK(7)	1	2.71e-05
P26786|RS7A_YEAST(157)-P05756|RS13_YEAST(27),P48164|RS7B_YEAST(157)-P05756|RS13_YEAST(27)	VLLDSKDVQQIDYKLESFQAVYNK(6)-NAPAWFKLSSESVIEQIVK(7)	1	3.3e-05
Q12499|NOP58_YEAST(24)-P28000|RPAC2_YEAST(1)	IYKSSSLIQDLDSSDK(3)-MTEDIEQK(1)	1	3.45e-05
Q12136|SAS10_YEAST(422)-Q06512|NOC4_YEAST(489)	FYTSKIDQQENK(5)-IFAQPFKK(7)	1	5.11e-05
P25694|CDC48_YEAST(346)-P39730|IF2P_YEAST(283)	VVSQLLTLMDGMKAR(13)-VVYSKKK(5)	1	5.7e-05
Q12136|SAS10_YEAST(537)-P37838|NOP4_YEAST(85)	LAELAENVSGDGKR(13)-EALAKAR(5)	1	7.37e-05
P15646|FBRL_YEAST(299)-P53914|KRE33_YEAST(484)	IKPLEQLTLEPYER(2)-YAPGDPIEKWLNK(9)	1	9.05e-05
Q12136|SAS10_YEAST(429)-Q06512|NOC4_YEAST(489)	IDQQENKK(7)-IFAQPFKK(7)	1	9.28e-05
P32899|IMP3_YEAST(46)-P05748|RL15A_YEAST(192)	TYHIQNREDYHKYNR(12)-TWKR(3)	1	9.95e-05
Q04305|UTP15_YEAST(411)-P40991|NOP2_YEAST(618)	WSEALDNAFVPGMAKELTLTVLQELR(15)-AKRPSNEK(8)	1	0.000139
P0C0W1|RS22A_YEAST(71)-Q05498|FCF1_YEAST(112),Q3E7Y3|RS22B_YEAST(71)-Q05498|FCF1_YEAST(112)	LNKCGVISPR(3)-LGPKYR(4)	1	0.000156
P0CX43|RL1A_YEAST(39)-P05737|RL7A_YEAST(158),P0CX44|RL1B_YEAST(39)-P05737|RL7A_YEAST(158)	NFLETVELQVGLKNYDPQR(13)-GFGKINKQR(7)	1	0.000213
P33750|DCA13_YEAST(449)-Q08962|NIP7_YEAST(75)	KDMPYISERK(1)-FTKTGKFR(3)	1	0.000229
Q08965|BMS1_YEAST(610)-Q08096|RCL1_YEAST(46)	EGNKDHAVDLEKFVPYFDTFEK(12)-SGDLNPGLKDYEVSFLR(9)	1	0.000246
Q06078|UTP21_YEAST(819)-P45818|ROK1_YEAST(559)	LGFESHFTKQLR(9)-NEELSKK(6)	1	0.000247
P40362|UTP18_YEAST(219)-P40693|RLP7_YEAST(210)	ILSTTYNYKDTLSNSK(9)-SLIQKR(5)	1	0.000257
P29295|HRR25_YEAST(232)-P25644|PAT1_YEAST(394)	KLNVSVETLCSGLPLEFQEYMAYCKNLK(1)-QANTVLGKISSTLNSKNPR(8)	1	0.000294
P32589|HSP7F_YEAST(656)-P25586|KRR1_YEAST(280)	SKQEASQMAAMAEKLAAQR(2)-KLNEQK(1)	1	0.000321
Q12499|NOP58_YEAST(138)-P0CX39|RS8A_YEAST(26),Q12499|NOP58_YEAST(138)-P0CX40|RS8B_YEAST(26)	EYLPELLPGMSDNDLSKMSLGLAHSIGR(17)-RKFELGR(2)	1	0.000378
Q12499|NOP58_YEAST(93)-Q06679|UTP4_YEAST(217)	STLIVSETKLANAINK(9)-IWSAQKNDENMGR(6)	1	0.00039
P35997|RS27_YEAST(20)-P43586|LOC1_YEAST(142),P38711|RS27B_YEAST(20)-P43586|LOC1_YEAST(142)	HKLKTLVQGPR(2)-KEIER(1)	1	0.000431
P40079|LCP5_YEAST(331)-Q03280|TOM1_YEAST(3029)	MNVIGGEDFGIFSSKR(15)-EVYKNILGR(4)	1	0.000437
P32589|HSP7F_YEAST(195)-P41805|RL10_YEAST(169)	TDLPEGEEKPR(9)-IILSKK(5)	1	0.000494
Q06679|UTP4_YEAST(765)-Q08492|BUD21_YEAST(194)	NPLTFHSKQK(8)-KESSIIR(1)	1	0.000517
Q05022|RRP5_YEAST(1650)-P39744|NOC2_YEAST(2)	SLFEGLVADAPKR(12)-GKVSK(1)	1	0.000644
P32861|UGPA1_YEAST(5)-Q02792|XRN2_YEAST(153)	KHTKTHSTYAFESNTNSVAASQMR(1)-KTWDSNAITPGTPFMDK(1)	1	0.000678
P53941|IMP4_YEAST(200)-P36160|RPF2_YEAST(53)	HDIINAGNQSEVNPHLIFDNFTTALGKR(27)-NLHDIMVDLSALKK(13)	1	0.000761
Q06205|FKBP4_YEAST(282)-P38934|BFR1_YEAST(261)	PKTKLLEGGIIIEDR(2)-LSKLLEQK(3)	1	0.000784
Q06506|RRP9_YEAST(430)-O13516|RS9A_YEAST(90),Q06506|RRP9_YEAST(430)-P05755|RS9B_YEAST(90)	KKPIFTER(1)-VGVLSEDKK(8)	1	0.000824
P14126|RL3_YEAST(340)-P12945|NAT1_YEAST(269)	KSLYTNTSR(1)-TLIKR(4)	1	0.000867
P38779|CIC1_YEAST(128)-P32892|DRS1_YEAST(702)	VLLILKDSDIK(6)-VTNSKKR(5)	1	0.000887
P53131|PRP43_YEAST(643)-P07260|IF4E_YEAST(122)	LMNRYNLELNTTDYESPKYFDNIR(18)-GKGADIDELWLR(2)	1	0.000977
P38333|ENP1_YEAST(170)-Q12754|RRP12_YEAST(26)	EKESQVEDMQDDEPLANEQNTSR(2)-SQVNSKLENQK(6)	1	0.00104
P20484|MAK11_YEAST(334)-Q00416|SEN1_YEAST(1948)	VEENEKQEDDDDK(6)-NNKKAESPSTSSGTK(4)	1	0.00107
Q06078|UTP21_YEAST(435)-P15790|CSK21_YEAST(84)	IGEWENIITAHKDEK(12)-EIKILTDLSNEK(3)	1	0.00107
Q12339|UTP23_YEAST(11)-P0CX31|RS24A_YEAST(43),Q12339|UTP23_YEAST(11)-P0CX32|RS24B_YEAST(43)	KQLLVYSHTFK(1)-EKLAEVYKAEK(2)	1	0.00111
Q05946|UTP13_YEAST(181)-P39516|RS14B_YEAST(2)	KCLHTLQEHTSAVR(1)-ANDLVQAR(1)	1	0.00114
P39969|BOI2_YEAST(921)-Q02792|XRN2_YEAST(516)	AQEMLAEAREETKLR(13)-IINKK(4)	1	0.00128
P38174|AMPM2_YEAST(93)-P40546|FAF1_YEAST(301)	YLKRDLER(3)-ATKRER(3)	1	0.00135
P53941|IMP4_YEAST(16)-P40470|RRT14_YEAST(45)	KAQELQDSQLQQK(1)-TSVNNGSKAQLIDR(8)	1	0.00142
Q06631|BFR2_YEAST(394)-P40546|FAF1_YEAST(36)	KDNNAIDITENPYVFDDEDFYR(1)-TKNIR(2)	1	0.00142
P05737|RL7A_YEAST(238)-P38249|EIF3A_YEAST(360)	EEFINKLVKSMN(6)-LLNLDAKPTR(7)	1	0.00142
Q05022|RRP5_YEAST(114)-P32558|SPT16_YEAST(502)	AGLIEHVNFKTLK(10)-ENQKKLHEK(4)	1	0.00143
Q05022|RRP5_YEAST(379)-Q12024|YTM1_YEAST(270)	TFSEEDLKHK(8)-LTMKDGTIR(4)	1	0.00151
Q08162|RRP44_YEAST(34)-Q03280|TOM1_YEAST(2270)	SRNGGATKIVR(8)-DLENKR(5)	1	0.00155
P34247|UTP11_YEAST(97)-P12945|NAT1_YEAST(601)	HGDEEDESLSMDQVKLLK(15)-ALYTKPMYVR(5)	1	0.00161
P06367|RS14A_YEAST(49)-Q05946|UTP13_YEAST(555),P39516|RS14B_YEAST(50)-Q05946|UTP13_YEAST(555)	VKADRDESSPYAAMLAAQDVAAK(2)-LLATSSGDKTVK(9)	1	0.00176
Q07915|RLP24_YEAST(125)-P32558|SPT16_YEAST(474)	KLVESNPELLR(1)-PDRNSKILR(6)	1	0.00176
P25635|PWP2_YEAST(27)-P35194|UTP20_YEAST(422)	QGNITFSDDGKQLLSPVGNR(11)-FLQLFLKK(7)	1	0.0018
Q07897|CMS1_YEAST(185)-P38336|POP4_YEAST(225)	VADVYRSLNGGKNCVK(12)-GNIIDEIKCIPKK(12)	1	0.00188
Q02892|NOG1_YEAST(289)-P12945|NAT1_YEAST(660)	SVMVVINKTDIIR(8)-EAAAMNKR(7)	1	0.00208
P53914|KRE33_YEAST(53)-P40546|FAF1_YEAST(2)	MNKSVLWAYK(3)-TLDDDDYIK(1)	1	0.00208
P40217|EIF3I_YEAST(330)-P38961|RRP8_YEAST(376)	SYFDFKYDVEKAAEAK(6)-KIAEGKWLLK(1)	1	0.00227
Q05022|RRP5_YEAST(778)-P29295|HRR25_YEAST(343)	KETLPLTYDDVKDLNK(1)-KFPTHFHYYK(1)	1	0.00242
Q12499|NOP58_YEAST(121)-Q99207|NOP14_YEAST(608)	AIKEYLPELLPGMSDNDLSKMSLGLAHSIGR(3)-LDSYELGLPLDVDFTKKR(16)	1	0.00243
Q06679|UTP4_YEAST(580)-Q03280|TOM1_YEAST(1159)	KSVVVITADNK(1)-SDSLFKTQSR(6)	1	0.00244
P0C0W1|RS22A_YEAST(36)-P0CS90|HSP77_YEAST(5),Q3E7Y3|RS22B_YEAST(36)-P0CS90|HSP77_YEAST(5)	VIIKFLQVMQK(4)-LAAKNILNR(4)	1	0.00248
P38788|SSZ1_YEAST(517)-Q08965|BMS1_YEAST(2)	LMELGIKNANGVEIIFNINKDGALR(20)-EQSNK(1)	1	0.00257
Q07915|RLP24_YEAST(91)-P53941|IMP4_YEAST(132)	YNRELVATTLKAMAR(11)-GNYVMPNLVDACKK(13)	1	0.00269
P42945|UTP10_YEAST(1)-P10591|HSP71_YEAST(316),P42945|UTP10_YEAST(1)-P10592|HSP72_YEAST(316)	MSSLSDQLAQVASNNATVALDR(1)-STLDPVEKVLR(8)	1	0.00274
Q12099|FAL1_YEAST(362)-Q00416|SEN1_YEAST(130)	FGRKGVAINFITK(4)-CKMLQHFAIQR(2)	1	0.00281
Q07623|NOP6_YEAST(184)-P37838|NOP4_YEAST(102)	LTKMINDGNQK(3)-VDIAKR(5)	1	0.00291
Q12389|DBP10_YEAST(831)-P0CX49|RL18A_YEAST(11),Q12389|DBP10_YEAST(831)-P0CX50|RL18B_YEAST(11)	VQVHKQTATVK(5)-QHKRSGHR(3)	1	0.00295
P26786|RS7A_YEAST(138)-Q12532|TAE2_YEAST(541)	ILEDLVFPTEIVGKR(14)-VEKNVGKAMK(7)	1	0.00297
P0C0W1|RS22A_YEAST(19)-P26784|RL16A_YEAST(170),Q3E7Y3|RS22B_YEAST(19)-P26784|RL16A_YEAST(170)	SSVLADALNAINNAEKTGKR(16)-VSSAEYYAKKR(9)	1	0.00304
Q99207|NOP14_YEAST(608)-Q12136|SAS10_YEAST(435)	LDSYELGLPLDVDFTKKR(16)-FKGDDDIPYK(2)	1	0.00311
P37838|NOP4_YEAST(539)-P12945|NAT1_YEAST(327)	QAKVIMEVKGSTAGR(3)-EELSKKLR(5)	1	0.00314
P26786|RS7A_YEAST(83)-P39730|IF2P_YEAST(235)	ELEKKFQDR(4)-KAEGKLLTR(5)	1	0.00315
P0CX43|RL1A_YEAST(24)-P04456|RL25_YEAST(96),P0CX44|RL1B_YEAST(24)-P04456|RL25_YEAST(96)	YSNETKKR(6)-ANKYQIKK(7)	1	0.00318
P39744|NOC2_YEAST(253)-P15646|FBRL_YEAST(212)	MAPYKIVKGAR(5)-ELISMAKKR(7)	1	0.00322
P53742|NOG2_YEAST(360)-P32899|IMP3_YEAST(1),P53742|NOG2_YEAST(360)-Q12136|SAS10_YEAST(1)	VWQYITLMKR(9)-MVRK(1)	1	0.00326
P46995|SET2_YEAST(345)-P16861|K6PF1_YEAST(891)	IMSVLLQQDNKIIASKLLK(16)-KNEASPNTDAKVLR(1)	1	0.00331
Q06506|RRP9_YEAST(122)-Q02892|NOG1_YEAST(501)	LKEDVAEQQGR(2)-QKTMIAEAR(2)	1	0.00348
Q12389|DBP10_YEAST(704)-P32892|DRS1_YEAST(433)	NPDDEMAVFMKR(11)-KPVR(1)	1	0.00353
Q03280|TOM1_YEAST(2465)-P39985|DPO5_YEAST(838)	AGIASLMKSVFISK(8)-FEVKQSR(4)	1	0.0037
Q05022|RRP5_YEAST(441)-P38996|NAB3_YEAST(488)	STEGLDAFPIGYTFESCSIKGR(20)-DGTGLETDMIFLKPRMELGK(13)	1	0.0037
P40991|NOP2_YEAST(410)-P07251|ATPA_YEAST(188)	LGCTNTIVCNYDAREFPKVIGGFDR(18)-SVHEPVQTGLKAVDALVPIGRGQR(11)	1	0.00373
P32899|IMP3_YEAST(165)-P53276|UTP8_YEAST(484)	NMEDYVTWVDNSKIK(13)-ELKIK(3)	1	0.00378
P52917|VPS4_YEAST(59)-Q05498|FCF1_YEAST(35)	DLIRAKFTEYLNR(6)-TKEDPELTR(2)	1	0.004
P36144|RL1D1_YEAST(9)-Q03940|RUVB1_YEAST(450)	VESNDIIKSGLAEK(8)-LLFLDAKR(7)	1	0.00426
P0CX31|RS24A_YEAST(83)-P35194|UTP20_YEAST(27),P0CX32|RS24B_YEAST(83)-P35194|UTP20_YEAST(27)	SVGFGLVYNSVAEAKK(15)-IDDLKIEPAR(5)	1	0.00429
P20447|DBP3_YEAST(179)-P40991|NOP2_YEAST(410)	DVVGVAETGSGKTFAFGVPAISHLMNDQKK(29)-EFPKVIGGFDR(4)	1	0.00444
Q04177|UTP5_YEAST(370)-P0CX82|RL19A_YEAST(43),Q04177|UTP5_YEAST(370)-P0CX83|RL19B_YEAST(43)	VTSGDNFKHVDDAIK(8)-NAIRKLVK(5)	1	0.00446
Q06287|NEP1_YEAST(109)-P47083|MPP10_YEAST(559)	AGKLQVYIQTSR(3)-NDVVDTLSKAK(9)	1	0.0045
Q04500|UTP14_YEAST(712)-P46995|SET2_YEAST(675)	GKSNDDEDLLLTADDSTR(2)-ILTTKELKK(8)	1	0.00458
P38333|ENP1_YEAST(199)-Q99207|NOP14_YEAST(257)	GNISSGLKSGEGVALPEK(8)-KNPMEPK(1)	1	0.00462
Q99207|NOP14_YEAST(129)-P40079|LCP5_YEAST(115)	DKLLTEEEKMLER(9)-PLEKK(4)	1	0.00465
P32899|IMP3_YEAST(73)-P0CX51|RS16A_YEAST(140),P32899|IMP3_YEAST(73)-P0CX52|RS16B_YEAST(140)	KHEQLLLDK(1)-FQKSYR(3)	1	0.00474
Q12460|NOP56_YEAST(186)-Q04225|RRB1_YEAST(489)	NDNHIIQAIALLDQLDKDINTFAMRVK(17)-WHKQIPGCLVSTGTDGLNVWK(3)	1	0.00479
P40055|UTP7_YEAST(109)-Q12499|NOP58_YEAST(417)	ALDLSLKEFGPYHIK(7)-EAKKVEMTEAR(3)	1	0.00485
Q12035|FCF2_YEAST(1)-P06105|SC160_YEAST(322)	MDQSVEDLFGALRDASASLEVK(1)-KLASNLDEEKVK(1)	1	0.00488
Q99207|NOP14_YEAST(88)-P53833|POP3_YEAST(14)	PGISKQIGEEQR(5)-IAKR(3)	1	0.0049
P46995|SET2_YEAST(172)-P53743|ESF2_YEAST(196)	LIDYDQRHFKHFYFMMLQNGEFIDATIK(10)-KGTFYHDDILNVKYLPGFK(1)	1	0.00502
P40482|SEC24_YEAST(275)-P09435|HSP73_YEAST(249)	LANDVPMQMDQSDPNDPKSR(18)-KDISNNQR(1)	1	0.00502
P05759|RS27A_YEAST(99)-Q08444|NOB1_YEAST(1)	KVKLAVLSYYK(3)-MTENQTAHVR(1)	1	0.00503
P06367|RS14A_YEAST(36)-P33442|RS3A1_YEAST(55),P39516|RS14B_YEAST(37)-P33442|RS3A1_YEAST(55)	IYASFNDTFVHVTDLSGKETIAR(18)-STGLKSASDALK(5)	1	0.0051
Q02892|NOG1_YEAST(334)-Q12532|TAE2_YEAST(906)	NKACEKLLASR(2)-RLQALKFTK(6)	1	0.00515
Q05946|UTP13_YEAST(533)-P38961|RRP8_YEAST(385)	IWNLENGELEATLANHKR(17)-WLLKPCIYK(4)	1	0.00529
Q03690|CLU_YEAST(115)-P0CX29|RS23A_YEAST(70),Q03690|CLU_YEAST(115)-P0CX30|RS23B_YEAST(70)	EALKHVITVR(4)-KCVR(1)	1	0.0053
P35194|UTP20_YEAST(2434)-Q08208|NOP12_YEAST(50)	IYTAVKQTVLER(6)-KRER(1)	1	0.00536
Q08287|NOP8_YEAST(163)-P43586|LOC1_YEAST(140),Q08287|NOP8_YEAST(163)-Q04217|DHR1_YEAST(24),Q08287|NOP8_YEAST(163)-Q06106|MRD1_YEAST(446)	INVNGSLKVYKCYK(11)-ELKR(3)	1	0.00541
P38712|RRP3_YEAST(218)-P06105|SC160_YEAST(1000)	LMDHLENTKGFSLR(9)-AEKKILNEIIR(4)	1	0.00542
Q08287|NOP8_YEAST(163)-P53914|KRE33_YEAST(82)	INVNGSLKVYKCYK(11)-EIKR(3)	1	0.00547
P0CX55|RS18A_YEAST(1)-P36080|RRP14_YEAST(212),P0CX56|RS18B_YEAST(1)-P36080|RRP14_YEAST(212)	MSLVVQEQGSFQHILR(1)-EELKK(4)	1	0.00563
Q12481|RRP36_YEAST(2)-P36036|YRA2_YEAST(141)	SYYFK(1)-KHSR(1)	1	0.00586
P53254|UTP22_YEAST(596)-Q02884|ELP4_YEAST(218)	SDFPITKR(7)-LADEKR(5)	1	0.00594
P38961|RRP8_YEAST(88)-P40055|UTP7_YEAST(188)	RKHDEEAPLMQVK(2)-LKQHIEAR(2)	1	0.00602
Q12035|FCF2_YEAST(125)-Q08965|BMS1_YEAST(1123)	DLLLIKHR(6)-AKDSK(2)	1	0.00614
P04456|RL25_YEAST(74)-Q04500|UTP14_YEAST(209)	VIEQPITSETAMKK(13)-LIDETKSK(6)	1	0.00623
P0CX43|RL1A_YEAST(39)-P15424|MS116_YEAST(579),P0CX44|RL1B_YEAST(39)-P15424|MS116_YEAST(579)	NFLETVELQVGLKNYDPQR(13)-FLDKLGLSR(4)	1	0.00628
P42945|UTP10_YEAST(272)-Q04500|UTP14_YEAST(710)	KTIILAAMETILSNLDAKEAK(1)-KGKSNDDEDLLLTADDSTR(1)	1	0.00637
P38712|RRP3_YEAST(224)-P47077|NOP9_YEAST(645)	KLKFLVMDEADR(1)-PEKHSR(3)	1	0.00668
Q05946|UTP13_YEAST(588)-P05743|RL26A_YEAST(116)	QKQLISCGADGLIKIWDCSSGECLK(2)-KALIQR(1)	1	0.00673
P53914|KRE33_YEAST(664)-Q06106|MRD1_YEAST(129)	DYFEGKFTDMSEDVR(6)-LLQEENRKK(8)	1	0.00675
P16862|K6PF2_YEAST(938)-P39935|IF4F1_YEAST(850)	MPKVIHWQATR(3)-HDKNWNSDK(3)	1	0.00678
Q03735|NAB6_YEAST(901)-Q03690|CLU_YEAST(1045)	QNEIDEKEKAFDK(7)-KACTIYER(1)	1	0.00685
Q12754|RRP12_YEAST(951)-P0C2H8|RL31A_YEAST(26)	SAIGFTKVCVLGLPEELMR(7)-LHGVSFKK(7)	1	0.00688
P06634|DED1_YEAST(1)-Q03280|TOM1_YEAST(2845)	MAELSEQVQNLSINDNNENGYVPPHLRGK(1)-LLDFSKTRVENLFFPFTDAHK(6)	1	0.00695
P40055|UTP7_YEAST(20)-Q03690|CLU_YEAST(165)	ERENQNKFER(7)-DEKSDPEEKK(3)	1	0.00711
P11484|HSP75_YEAST(58)-P47077|NOP9_YEAST(454),P40150|HSP76_YEAST(58)-P47077|NOP9_YEAST(454)	LIGDAAKNQAALNPR(7)-YYPEKSDAK(5)	1	0.00717
Q12404|MPD1_YEAST(125)-P42945|UTP10_YEAST(1102)	IDLSKPIDNAKK(11)-LLTSSKSSSEK(6)	1	0.00718
P05743|RL26A_YEAST(108)-Q02908|ELP3_YEAST(19)	LVITKLHLDK(5)-LAPEKER(5)	1	0.00723
P38961|RRP8_YEAST(146)-P05750|RS3_YEAST(194)	LIKEQPQLFDEYHDGFRSQVQAWPENPVDVFVDQIR(3)-IMRDPAKSR(7)	1	0.00724
Q06132|SGD1_YEAST(299)-Q02354|UTP6_YEAST(389)	EKENPYVAPTQSVESYVPPSLRK(2)-LDIDQLQLSVKK(11)	1	0.00738
P40055|UTP7_YEAST(543)-Q00416|SEN1_YEAST(931)	QGLISEDHKDVIEEALSR(9)-EKELSR(2)	1	0.00738
P38174|AMPM2_YEAST(41)-P11484|HSP75_YEAST(539),P38174|AMPM2_YEAST(41)-P40150|HSP76_YEAST(539)	ADESDPVESKKK(10)-KHEAR(1)	1	0.00743
P47083|MPP10_YEAST(392)-P32899|IMP3_YEAST(73)	KSQRPQFELSDVK(1)-KHEQLLLDK(1)	1	0.00757
Q03532|HAS1_YEAST(163)-P25368|RRP7_YEAST(255)	LMKGVNMLIATPGR(3)-KDFYR(1)	1	0.0076
P53131|PRP43_YEAST(569)-Q06287|NEP1_YEAST(54)	ADDAKNIFAHPDGDHITLLNVYHAFK(5)-MIVVLAMASLETHKISSNGPGGDK(14)	1	0.0077
Q12754|RRP12_YEAST(538)-Q06078|UTP21_YEAST(819)	NANLATFQNELAPYIKSFQSK(16)-LGFESHFTKQLR(9)	1	0.00776
P39938|RS26A_YEAST(4)-P35194|UTP20_YEAST(2466),P39939|RS26B_YEAST(4)-P35194|UTP20_YEAST(2466)	MPKKR(4)-KHAR(1)	1	0.0078
P53218|POP6_YEAST(1)-P38786|RPP1_YEAST(66)	MINGVYYNEISR(1)-LLNPIDIKR(8)	1	0.00784
Q08965|BMS1_YEAST(646)-Q08096|RCL1_YEAST(213)	FLGAGILGNDNKTK(12)-MIDGAKK(6)	1	0.00795
Q12389|DBP10_YEAST(981)-Q12754|RRP12_YEAST(1112)	IIAEKK(5)-KFNK(1)	1	0.00798
P34241|URB1_YEAST(1173)-Q06679|UTP4_YEAST(459)	KVISNSFFELLR(1)-VFHLQPVGNKLK(10)	1	0.00806
P07259|PYR1_YEAST(1801)-P33750|DCA13_YEAST(355)	RWSPFNKDMNGGIER(7)-MQHVFQVKYSMDSK(8)	1	0.00813
P00830|ATPB_YEAST(19)-P07260|IF4E_YEAST(1)	AAKQSAPLLSTSWKR(3)-MSVEEVSK(1)	1	0.0082
Q06214|JIP5_YEAST(257)-Q04177|UTP5_YEAST(273)	FISLGQTTLAYFDVRDKDAK(17)-SKKSSK(2)	1	0.00824
P05750|RS3_YEAST(223)-Q04500|UTP14_YEAST(697)	EEEPILAPSVKDYR(11)-AMNKMEK(4)	1	0.0083
P04911|H2A1_YEAST(22)-P02293|H2B1_YEAST(124),P04911|H2A1_YEAST(22)-P02294|H2B2_YEAST(124),P04912|H2A2_YEAST(22)-P02293|H2B1_YEAST(124),P04912|H2A2_YEAST(22)-P02294|H2B2_YEAST(124)	SAKAGLTFPVGR(3)-AVTKYSSSTQA(4)	1	0.00842
P41811|COPB2_YEAST(390)-P32589|HSP7F_YEAST(571)	FVTVVGDGEYVIYTALAWRNKAFGK(21)-KNTLEEYIYTLR(1)	1	0.00862
P25359|RRP43_YEAST(45)-P06634|DED1_YEAST(247)	KYEEFRDVAIENNTLSR(1)-KFTYR(1)	1	0.00877
Q03690|CLU_YEAST(740)-P12945|NAT1_YEAST(108)	AVEQDNKEYEDWEKSYLQK(7)-NTKEYKESIK(6)	1	0.00888
P25694|CDC48_YEAST(221)-Q02931|UTP17_YEAST(423)	KQMAQIREMVELPLR(1)-KQSR(1)	1	0.0089
Q02931|UTP17_YEAST(163)-P42945|UTP10_YEAST(644)	DPSQKAHNSLQSYR(5)-ILTPKR(5)	1	0.00895
P25359|RRP43_YEAST(84)-P38996|NAB3_YEAST(445)	SGKTIVITSITGGIIEETSAAIK(3)-PFQTESGDMYNDDNGAGYKK(19)	1	0.00905
P32589|HSP7F_YEAST(600)-P40079|LCP5_YEAST(88)	TKLQGMLNKAEEWLYDEGFDSIK(2)-LDDECKDPSAMDARER(6)	1	0.00933
P52917|VPS4_YEAST(215)-P40079|LCP5_YEAST(2)	LVKQLFAMAR(3)-SELNALLK(1)	1	0.00939
Q02884|ELP4_YEAST(319)-P12945|NAT1_YEAST(37)	SLVKKYYER(4)-QYKK(3)	1	0.00949
P53254|UTP22_YEAST(354)-Q03690|CLU_YEAST(790)	KQTESFVEATVLGR(1)-LNDEEIKK(7)	1	0.00963
Q12532|TAE2_YEAST(652)-P16474|GRP78_YEAST(2)	KISSSPWWCFAK(1)-FFNRLSAGK(1)	1	0.00964
P53622|COPA_YEAST(284)-P47077|NOP9_YEAST(400)	TLRVWDLDKR(9)-EKDVK(2)	1	0.00998
Intra-Molecular
Q05946|UTP13_YEAST(751)-Q05946|UTP13_YEAST(699)	DWNTNAKTHTIAQR(7)-LFNVLKR(6), CRDWNTNAKTHTIAQR(9)-LFNVLKR(6)	225	5.81e-16
Q04217|DHR1_YEAST(351)-Q04217|DHR1_YEAST(346)	KEDLDDGLQEAYVPINENSTR(1)-DQELVTPTLNIDYKPIIR(14)	202	3.36e-14
P48234|NOL10_YEAST(266)-P48234|NOL10_YEAST(298)	TSEPSIIKDQGYGFDIKK(8)-IAKIWDR(3), TSEPSIIKDQGYGFDIK(8)-IAKIWDR(3)	182	9.84e-10
P40362|UTP18_YEAST(154)-P40362|UTP18_YEAST(134)	TSYNESKINGVHYINR(7)-IKVPILVTNK(2)	172	2.72e-18
Q04217|DHR1_YEAST(749)-Q04217|DHR1_YEAST(386)	VFQKPPQGSR(4)-SDEIQKAR(6)	155	9.56e-08
Q05022|RRP5_YEAST(686)-Q05022|RRP5_YEAST(757)	VSNEQAAQQKDTIENIVPGR(10)-IGTELTGLVIDKDTR(12)	152	1.14e-23
Q06679|UTP4_YEAST(556)-Q06679|UTP4_YEAST(580)	GCGVVDILDLKAR(11)-KSVVVITADNK(1)	132	8.26e-26
Q06506|RRP9_YEAST(114)-Q06506|RRP9_YEAST(350)	TIDEYNNFDAGDLDKDIIASR(15)-TAMLWKIPDETR(6), TIDEYNNFDAGDLDKDIIASR(15)-DRTAMLWKIPDETR(8)	129	1.47e-16
P0CX49|RL18A_YEAST(116)-P0CX49|RL18A_YEAST(98),P0CX50|RL18B_YEAST(116)-P0CX50|RL18B_YEAST(98)	IVKAGGECITLDQLAVR(3)-IFEFPKTTVAALR(6)	110	2.63e-13
P05756|RS13_YEAST(39)-P05756|RS13_YEAST(43)	LSSESVIEQIVKYAR(12)-KGLTPSQIGVLLR(1)	109	1.13e-35
P41812|POP1_YEAST(536)-P41812|POP1_YEAST(519)	TTVPFKESDDPSIPLVIIR(6)-YKLLTATPNSINK(2)	107	9.81e-21
P0CX35|RS4A_YEAST(233)-P0CX35|RS4A_YEAST(161),P0CX36|RS4B_YEAST(233)-P0CX36|RS4B_YEAST(161)	LNNVFVIGEQGKPYISLPK(12)-VNDTVKIDLASGK(6)	103	2.37e-14
P40362|UTP18_YEAST(219)-P40362|UTP18_YEAST(232)	ILSTTYNYKDTLSNSK(9)-KLDIVR(1)	103	9.26e-09
P0CX31|RS24A_YEAST(21)-P0CX31|RS24A_YEAST(49),P0CX32|RS24B_YEAST(21)-P0CX32|RS24B_YEAST(49)	KQFVVDVLHPNR(1)-LAEVYKAEKDAVSVFGFR(6), KQFVVDVLHPNR(1)-LAEVYKAEK(6)	99	1.76e-11
Q04177|UTP5_YEAST(392)-Q04177|UTP5_YEAST(473)	ELTSLEQEQAKPPQANELLTETFGDKLESSTVAR(11)-LKPALAVILLER(2)	97	2.98e-37
Q06679|UTP4_YEAST(580)-Q06679|UTP4_YEAST(561)	KSVVVITADNK(1)-ISKPLAR(3)	91	3.67e-08
Q06506|RRP9_YEAST(114)-Q06506|RRP9_YEAST(122)	TIDEYNNFDAGDLDKDIIASR(15)-LKEDVAEQQGR(2)	88	2.37e-11
Q06679|UTP4_YEAST(556)-Q06679|UTP4_YEAST(561)	GCGVVDILDLKAR(11)-ISKPLAR(3)	86	8.14e-08
Q05022|RRP5_YEAST(1664)-Q05022|RRP5_YEAST(1623)	IDLWNVYVDQEVKAK(13)-KFAQLEFAK(1), RIDLWNVYVDQEVKAK(14)-KFAQLEFAK(1)	83	4.23e-15
Q06506|RRP9_YEAST(367)-Q06506|RRP9_YEAST(431)	GGDEPQKLLR(7)-KPIFTER(1)	77	3.2e-18
P11484|HSP75_YEAST(161)-P11484|HSP75_YEAST(428),P40150|HSP76_YEAST(161)-P40150|HSP76_YEAST(428)	QATKDAGAISGLNVLR(4)-NTTVPTIKR(8)	75	7.01e-12
Q06679|UTP4_YEAST(630)-Q06679|UTP4_YEAST(624)	TLKENCVGIFSDIENSSR(3)-NNTDNLPKEWK(8)	73	1.26e-12
P15646|FBRL_YEAST(121)-P15646|FBRL_YEAST(102)	NMAPGESVYGEKR(12)-GKEDLLVTK(2)	72	2.56e-12
Q06078|UTP21_YEAST(661)-Q06078|UTP21_YEAST(9)	AQFKTVSTR(4)-KVEEDVR(1)	71	8.84e-13
Q12136|SAS10_YEAST(225)-Q12136|SAS10_YEAST(293)	TMFPEFAPLSKEFTELAPK(11)-ILTTKEIWR(5)	71	1.02e-09
Q12159|YRA1_YEAST(79)-Q12159|YRA1_YEAST(70)	EVKVNVEGLPR(3)-VAKLLDTTR(3)	68	3.15e-14
P0CX29|RS23A_YEAST(123)-P0CX29|RS23A_YEAST(70),P0CX30|RS23B_YEAST(123)-P0CX30|RS23B_YEAST(70)	FKVVK(2)-KCVR(1)	68	3.85e-06
P53914|KRE33_YEAST(915)-P53914|KRE33_YEAST(919)	ELNLPSNQTIAMFAKIMR(15)-KMSQYFR(1)	67	2.57e-14
P32899|IMP3_YEAST(91)-P32899|IMP3_YEAST(73)	LYAMGVLTTKSK(10)-KHEQLLLDK(1), LYAMGVLTTKSK(10)-RKHEQLLLDK(2)	64	1.04e-15
P25635|PWP2_YEAST(27)-P25635|PWP2_YEAST(85)	QGNITFSDDGKQLLSPVGNR(11)-AILVNFKAR(7)	61	1.24e-10
P53941|IMP4_YEAST(200)-P53941|IMP4_YEAST(207)	HDIINAGNQSEVNPHLIFDNFTTALGKR(27)-VVCILKHLFNAGPK(6)	60	1.54e-21
P47083|MPP10_YEAST(309)-P47083|MPP10_YEAST(302)	KQIEQLENEAVAEK(1)-NLSSFEKQQIEIR(7), KQIEQLENEAVAEKK(1)-NLSSFEKQQIEIR(7)	58	1.13e-11
P33750|DCA13_YEAST(210)-P33750|DCA13_YEAST(143)	LKPVSDLSWGADNITSLK(2)-SQNFMLSCSDDKTVK(12)	57	1.72e-11
Q05022|RRP5_YEAST(1199)-Q05022|RRP5_YEAST(1169)	KVEAFVPVSK(1)-SIKSHEDLK(3), KVEAFVPVSK(1)-SIKSHEDLKQGEIVDGIVK(3)	52	2.39e-19
P36144|RL1D1_YEAST(89)-P36144|RL1D1_YEAST(170)	ETLTKDEHTSELFK(5)-QQMVEKCDPIYVR(6)	52	5.04e-11
P48589|RS12_YEAST(114)-P48589|RS12_YEAST(50)	KVVGASVVVVK(1)-ESTKALTR(4)	50	1.36e-07
P32324|EF2_YEAST(50)-P32324|EF2_YEAST(2)	AGIISAAKAGEAR(8)-VAFTVDQMR(1)	49	4.8e-13
Q06287|NEP1_YEAST(164)-Q06287|NEP1_YEAST(158)	VIKNPITDHLPTK(3)-SVNSEEKLLK(7), LLKVIKNPITDHLPTK(6)-SVNSEEKLLK(7)	48	4.68e-09
Q06506|RRP9_YEAST(350)-Q06506|RRP9_YEAST(122)	TAMLWKIPDETR(6)-LKEDVAEQQGR(2)	47	2.3e-11
Q12220|UTP12_YEAST(318)-Q12220|UTP12_YEAST(230)	SIKESYSSFILHPFQTIR(3)-IWKLDIENDK(3)	45	5.98e-15
Q06679|UTP4_YEAST(342)-Q06679|UTP4_YEAST(59)	AICAYQSKGADFLVSGGVEK(8)-SNINKLTPSDLR(5)	44	5.69e-08
Q12136|SAS10_YEAST(510)-Q12136|SAS10_YEAST(506)	KEAHK(1)-KISR(1)	44	1.07e-06
P02407|RS17A_YEAST(116)-P02407|RS17A_YEAST(81),P14127|RS17B_YEAST(116)-P14127|RS17B_YEAST(81)	SLGLKLPLSVINVSAQR(5)-KDQYVPEVSALDLSR(1)	43	3.93e-20
P32861|UGPA1_YEAST(301)-P32861|UGPA1_YEAST(280)	LLEVAQVPKEHIDEFK(9)-ADVKGGTLISYDGQVR(4)	43	1.87e-15
Q12159|YRA1_YEAST(127)-Q12159|YRA1_YEAST(70)	GQSTGMANITFKNGELAR(12)-VAKLLDTTR(3)	43	1.59e-14
P47083|MPP10_YEAST(295)-P47083|MPP10_YEAST(309)	LDLFADEEDEPNAEGVGEASDKNLSSFEK(22)-KQIEQLENEAVAEK(1), LDLFADEEDEPNAEGVGEASDKNLSSFEK(22)-KQIEQLENEAVAEKK(1)	42	1.29e-22
Q04217|DHR1_YEAST(571)-Q04217|DHR1_YEAST(346)	VSDFSENKTLFPIAPPVLQVDAR(8)-DQELVTPTLNIDYKPIIR(14)	42	2.43e-07
Q04217|DHR1_YEAST(571)-Q04217|DHR1_YEAST(351)	VSDFSENKTLFPIAPPVLQVDAR(8)-KEDLDDGLQEAYVPINENSTR(1)	41	4.16e-08
Q06287|NEP1_YEAST(213)-Q06287|NEP1_YEAST(2)	GKDNFADEYVDEK(2)-VEDSR(1)	41	2.53e-07
Q06679|UTP4_YEAST(371)-Q06679|UTP4_YEAST(773)	KMPTVEPYSK(1)-AFIQPKLVF(6)	41	2.84e-06
Q12754|RRP12_YEAST(538)-Q12754|RRP12_YEAST(546)	NANLATFQNELAPYIKSFQSK(16)-FDKVPEESIQLR(3)	40	2.19e-14
P0C0W9|RL11A_YEAST(174)-P0C0W9|RL11A_YEAST(87),Q3E757|RL11B_YEAST(174)-Q3E757|RL11B_YEAST(87)	QKYDADVLDK(10)-VKEYQLR(2), YDADVLDK(8)-VKEYQLR(2)	40	1.15e-12
P39730|IF2P_YEAST(539)-P39730|IF2P_YEAST(552)	LYDWKAIPNNSFR(5)-DSFAKQSR(5)	40	3.92e-08
P40079|LCP5_YEAST(331)-P40079|LCP5_YEAST(333)	MNVIGGEDFGIFSSKR(15)-KLEDSTSR(1)	40	4.31e-08
P38882|UTP9_YEAST(81)-P38882|UTP9_YEAST(83)	VSDVIFFGWCSDLIDTQSSNIKR(22)-KLDEDEGTGESSEQR(1)	39	2.9e-11
P0CX39|RS8A_YEAST(151)-P0CX39|RS8A_YEAST(142),P0CX40|RS8B_YEAST(151)-P0CX40|RS8B_YEAST(142)	AASAKIESSVESQFSAGR(5)-KWAAR(1)	39	1.88e-09
P38712|RRP3_YEAST(218)-P38712|RRP3_YEAST(199)	LMDHLENTKGFSLR(9)-KPHIIIATPGR(1)	37	9.34e-13
P0CX35|RS4A_YEAST(174)-P0CX35|RS4A_YEAST(198),P0CX36|RS4B_YEAST(174)-P0CX36|RS4B_YEAST(198)	ITDFIKFDAGK(6)-IGTIVHKER(7)	36	2.88e-10
P25586|KRR1_YEAST(83)-P25586|KRR1_YEAST(87)	ALDKHNIACVLDLVEGSMTVKTTR(21)-KTYDPAIILK(1), HNIACVLDLVEGSMTVKTTR(17)-KTYDPAIILK(1)	33	6.97e-24
Q08965|BMS1_YEAST(967)-Q08965|BMS1_YEAST(933)	FEGAQIKTVSGIR(7)-LKLVGFPYK(2)	33	1.15e-12
Q06078|UTP21_YEAST(22)-Q06078|UTP21_YEAST(661)	NSKIFSPFR(3)-AQFKTVSTR(4)	32	6.19e-09
Q12220|UTP12_YEAST(404)-Q12220|UTP12_YEAST(420)	SIDISDDNKLLATASNGSLK(9)-IWNIKTHK(5)	31	2.78e-07
Q99207|NOP14_YEAST(465)-Q99207|NOP14_YEAST(404)	SLSEKYNR(5)-IVKNIIK(3)	30	2.4e-06
Q04500|UTP14_YEAST(297)-Q04500|UTP14_YEAST(285)	QEVSKWNDIVQQNR(5)-KAAYEISR(1)	29	3.51e-13
P38712|RRP3_YEAST(250)-P38712|RRP3_YEAST(272)	ILKIIPTQER(3)-IDKLQR(3)	29	6.93e-12
Q04217|DHR1_YEAST(472)-Q04217|DHR1_YEAST(484)	VANELGDHGHKVGYQIR(11)-FDSTAKEDTK(6)	29	2.09e-10
Q99207|NOP14_YEAST(74)-Q99207|NOP14_YEAST(83)	DGLPSKTADR(6)-IAVGKPGISK(5)	29	8.79e-07
P26786|RS7A_YEAST(76)-P26786|RS7A_YEAST(84)	VQTKLTR(4)-KFQDR(1)	29	1.82e-05
P11484|HSP75_YEAST(143)-P11484|HSP75_YEAST(161),P40150|HSP76_YEAST(143)-P40150|HSP76_YEAST(161)	VEKAVITVPAYFNDAQR(3)-QATKDAGAISGLNVLR(4)	26	1.05e-14
P36144|RL1D1_YEAST(265)-P36144|RL1D1_YEAST(2)	ENQKNEDLSDIKL(4)-VESNDIIK(1)	26	2.04e-13
P35194|UTP20_YEAST(27)-P35194|UTP20_YEAST(202)	IDDLKIEPAR(5)-KCPVSNLR(1)	26	1.36e-06
Q06631|BFR2_YEAST(394)-Q06631|BFR2_YEAST(341)	KDNNAIDITENPYVFDDEDFYR(1)-TKLNR(2)	26	0.000161
P32598|PP12_YEAST(22)-P32598|PP12_YEAST(97)	GSKPGQQVDLEENEIR(3)-GKQSLETICLLLAYK(2)	25	9.1e-20
P0C0W1|RS22A_YEAST(36)-P0C0W1|RS22A_YEAST(119),Q3E7Y3|RS22B_YEAST(36)-Q3E7Y3|RS22B_YEAST(119)	VIIKFLQVMQK(4)-KHVSGK(1)	25	1.62e-09
Q05022|RRP5_YEAST(686)-Q05022|RRP5_YEAST(660)	VSNEQAAQQKDTIENIVPGR(10)-LGQTVIVKLLDVDADR(8)	25	2.65e-06
Q12220|UTP12_YEAST(877)-Q12220|UTP12_YEAST(884)	NEELKLQINR(5)-VKTELR(2)	25	4.18e-06
Q04305|UTP15_YEAST(253)-Q04305|UTP15_YEAST(297)	GNFNKAVTCLDYVENFDSPMQSALIASSLDGHVK(5)-FGWKFSGPVLSCAVSPSTAQGNR(4)	24	4.39e-28
P0CX35|RS4A_YEAST(155)-P0CX35|RS4A_YEAST(198),P0CX36|RS4B_YEAST(155)-P0CX36|RS4B_YEAST(198)	YPDPNIKVNDTVK(7)-IGTIVHKER(7), TIRYPDPNIKVNDTVK(10)-IGTIVHKER(7)	24	2.49e-11
P35194|UTP20_YEAST(2054)-P35194|UTP20_YEAST(2059)	SVYYQFLMEYDQSKGR(14)-LEKQFK(3)	24	1.93e-05
P53914|KRE33_YEAST(498)-P53914|KRE33_YEAST(484)	LLCLDVTLIKNPR(10)-YAPGDPIEKWLNK(9)	23	8.08e-09
Q04217|DHR1_YEAST(1018)-Q04217|DHR1_YEAST(1043)	LLSVVSAMDYVPKEQK(13)-KQLMYIIK(1)	23	3.14e-07
P25368|RRP7_YEAST(278)-P25368|RRP7_YEAST(285)	FKEDQER(2)-IKVMK(2)	23	5.59e-05
P41812|POP1_YEAST(679)-P41812|POP1_YEAST(688)	NDKTLELMDSK(3)-KTGQFNAQGVR(1)	22	1.14e-10
Q12136|SAS10_YEAST(247)-Q12136|SAS10_YEAST(238)	SEENEFNKLK(8)-FDELKK(5)	22	5.42e-09
Q02354|UTP6_YEAST(290)-Q02354|UTP6_YEAST(283)	HKGYYAISDSK(2)-TLGKHYINK(4)	21	1.35e-10
P25635|PWP2_YEAST(572)-P25635|PWP2_YEAST(557)	FTAKNSER(4)-KDIISGR(1)	21	3.57e-09
P02407|RS17A_YEAST(81)-P02407|RS17A_YEAST(63),P14127|RS17B_YEAST(81)-P14127|RS17B_YEAST(63)	KDQYVPEVSALDLSR(1)-IQKGPVR(3)	21	1.25e-05
Q05022|RRP5_YEAST(114)-Q05022|RRP5_YEAST(399)	AGLIEHVNFKTLK(10)-IIACLENKSGDK(8)	20	1.56e-05
Q06287|NEP1_YEAST(12)-Q06287|NEP1_YEAST(2)	VRDALKGGDQK(6)-VEDSR(1), DALKGGDQK(4)-VEDSR(1)	19	4.96e-08
Q06287|NEP1_YEAST(109)-Q06287|NEP1_YEAST(2)	AGKLQVYIQTSR(3)-VEDSR(1)	19	1.74e-07
Q06679|UTP4_YEAST(765)-Q06679|UTP4_YEAST(371)	NPLTFHSKQK(8)-KMPTVEPYSK(1)	18	6.58e-11
Q04177|UTP5_YEAST(407)-Q04177|UTP5_YEAST(473)	ELTSLEQEQAKPPQANELLTETFGDKLESSTVAR(26)-LKPALAVILLER(2)	17	3.62e-24
P53941|IMP4_YEAST(63)-P53941|IMP4_YEAST(33)	YDQSLKESEEADDLQVDDEYAATSGIMDPR(6)-QIIKQALAQGKPLPK(4)	17	5.72e-12
P05749|RL22A_YEAST(99)-P05749|RL22A_YEAST(2)	FVSTKTNEYR(5)-APNTSR(1)	17	4.85e-10
P0C0W1|RS22A_YEAST(19)-P0C0W1|RS22A_YEAST(71),Q3E7Y3|RS22B_YEAST(19)-Q3E7Y3|RS22B_YEAST(71)	SSVLADALNAINNAEKTGKR(16)-LNKCGVISPR(3), SSVLADALNAINNAEKTGK(16)-LNKCGVISPR(3)	17	8.56e-08
P32324|EF2_YEAST(2)-P32324|EF2_YEAST(61)	VAFTVDQMR(1)-KDEQER(1)	17	1.64e-07
P42945|UTP10_YEAST(149)-P42945|UTP10_YEAST(172)	NTEMLLLSTLNYYQTPVFKR(19)-SEKPPTALTMIK(3)	17	3.83e-06
Q12220|UTP12_YEAST(892)-Q12220|UTP12_YEAST(884)	SALKSTEDDLGFNVQGLK(4)-VKTELR(2)	16	6.05e-09
Q08965|BMS1_YEAST(940)-Q08965|BMS1_YEAST(982)	LVGFPYKIFK(7)-ALSKPEGHYR(4)	16	5.89e-08
P0CX37|RS6A_YEAST(214)-P0CX37|RS6A_YEAST(235),P0CX38|RS6B_YEAST(214)-P0CX38|RS6B_YEAST(235)	EAAAEYAQLLAKR(12)-ASSLKA(5)	16	1.15e-05
Q05022|RRP5_YEAST(22)-Q05022|RRP5_YEAST(8)	EDSTKQPSTSSLVR(5)-KRDEDFPLSR(1)	16	0.000127
P0CX31|RS24A_YEAST(21)-P0CX31|RS24A_YEAST(11),P0CX32|RS24B_YEAST(21)-P0CX32|RS24B_YEAST(11)	KQFVVDVLHPNR(1)-KVISNPLLAR(1)	15	5.68e-20
P0CX47|RS11A_YEAST(141)-P0CX47|RS11A_YEAST(43),P0CX48|RS11B_YEAST(141)-P0CX48|RS11B_YEAST(43)	FNVVKVSAAAGK(5)-NAGLGFKTPK(7)	15	6.06e-05
Q06506|RRP9_YEAST(139)-Q06506|RRP9_YEAST(122)	YFGDKLLISEAK(5)-LKEDVAEQQGR(2)	14	5.14e-09
P53914|KRE33_YEAST(819)-P53914|KRE33_YEAST(840)	AQDLSDDEKHDNKELTR(9)-THLDDIFSPFDLKR(13)	14	2.88e-08
Q06506|RRP9_YEAST(367)-Q06506|RRP9_YEAST(374)	GGDEPQKLLR(7)-WMKENAK(3)	14	3.99e-07
Q04217|DHR1_YEAST(11)-Q04217|DHR1_YEAST(2)	FNEKAR(4)-GTYR(1)	14	6.98e-07
Q08965|BMS1_YEAST(646)-Q08965|BMS1_YEAST(632)	FLGAGILGNDNKTK(12)-SVDAIKER(6)	13	1.44e-06
P42945|UTP10_YEAST(1754)-P42945|UTP10_YEAST(1712)	TGLVKVVENVLGEPFDR(5)-AMKLIYSK(3)	13	7.77e-06
Q99216|PNO1_YEAST(144)-Q99216|PNO1_YEAST(93)	TNPKFTTDPGALQK(4)-IKFESR(2)	13	3.76e-05
Q06506|RRP9_YEAST(91)-Q06506|RRP9_YEAST(350)	NAEEKDLNNLKER(5)-TAMLWKIPDETR(6)	12	5.36e-12
P40498|UTP25_YEAST(230)-P40498|UTP25_YEAST(299)	SSSIYSYFLKQR(10)-ILKNNQR(3)	12	1.6e-09
P38333|ENP1_YEAST(199)-P38333|ENP1_YEAST(212)	GNISSGLKSGEGVALPEK(8)-VIKAYTTVGSILK(3)	11	4.53e-14
Q12159|YRA1_YEAST(79)-Q12159|YRA1_YEAST(90)	EVKVNVEGLPR(3)-DIKQDAVR(3)	11	1.21e-06
P10591|HSP71_YEAST(316)-P10591|HSP71_YEAST(322),P10592|HSP72_YEAST(316)-P10592|HSP72_YEAST(322)	STLDPVEKVLR(8)-DAKLDK(3)	11	6.18e-06
P15646|FBRL_YEAST(121)-P15646|FBRL_YEAST(85)	NMAPGESVYGEKR(12)-GGAKVVIEPHR(4)	11	2.75e-05
P38333|ENP1_YEAST(419)-P38333|ENP1_YEAST(450)	VLPVIWHKAFLTFAQR(8)-GHKDIGPEIR(3)	10	2.36e-10
Q12136|SAS10_YEAST(537)-Q12136|SAS10_YEAST(548)	LAELAENVSGDGKR(13)-NKGLTPK(2)	10	2.29e-08
Q06679|UTP4_YEAST(54)-Q06679|UTP4_YEAST(197)	FVDFTPATITSLAFSHKSNINK(17)-KDDFVIGGCSDGR(1)	10	1.41e-06
P53254|UTP22_YEAST(166)-P53254|UTP22_YEAST(154)	IVSVPFVDPKPIPQNTNYK(10)-SLAEVDSFFKNK(10)	10	5.05e-05
P26786|RS7A_YEAST(44)-P26786|RS7A_YEAST(101)	AELRPLQFKSIR(9)-ILPKPSR(4)	10	5.1e-05
Q06679|UTP4_YEAST(765)-Q06679|UTP4_YEAST(773)	NPLTFHSKQK(8)-AFIQPKLVF(6)	10	5.13e-05
Q99216|PNO1_YEAST(86)-Q99216|PNO1_YEAST(93)	FTSASKTQGNK(6)-IKFESR(2)	10	0.000233
Q06287|NEP1_YEAST(147)-Q06287|NEP1_YEAST(158)	FSGLMVQLLHKLSIR(11)-SVNSEEKLLK(7)	9	3.02e-12
P41812|POP1_YEAST(388)-P41812|POP1_YEAST(316)	EKLTVQDCR(2)-SIIGKLTAER(5)	9	2.31e-08
Q06287|NEP1_YEAST(109)-Q06287|NEP1_YEAST(12)	AGKLQVYIQTSR(3)-DALKGGDQK(4)	9	1.33e-07
Q06287|NEP1_YEAST(109)-Q06287|NEP1_YEAST(36)	AGKLQVYIQTSR(3)-DKITK(2)	9	6.35e-05
P40055|UTP7_YEAST(346)-P40055|UTP7_YEAST(20)	DALKLSGDSKPCFGSMGGNPHR(4)-ENQNKFER(5)	9	0.00021
Q06078|UTP21_YEAST(819)-Q06078|UTP21_YEAST(794)	LGFESHFTKQLR(9)-DQEAQKK(6)	9	0.000313
P26786|RS7A_YEAST(179)-P26786|RS7A_YEAST(148)	LTGKQIVFEIPSETH(4)-YLVGGNKIQK(7)	9	0.000347
P11484|HSP75_YEAST(58)-P11484|HSP75_YEAST(73),P40150|HSP76_YEAST(58)-P40150|HSP76_YEAST(73)	LIGDAAKNQAALNPR(7)-NTVFDAKR(7)	8	3.42e-07
P05737|RL7A_YEAST(53)-P05737|RL7A_YEAST(66)	NAAYQKEYETAER(6)-NIIQAKR(6)	8	8.57e-07
Q06078|UTP21_YEAST(795)-Q06078|UTP21_YEAST(806)	KLDAEEQMNK(1)-FKVTGR(2)	8	2.83e-06
Q04217|DHR1_YEAST(29)-Q04217|DHR1_YEAST(2)	NKQFTR(2)-GTYR(1)	8	6.51e-05
P06704|CDC31_YEAST(123)-P06704|CDC31_YEAST(116)	VAKELGETLTDEELR(3)-ISIKNLR(4)	8	0.000102
P40079|LCP5_YEAST(234)-P40079|LCP5_YEAST(239)	EHKDR(3)-SNKSR(3)	8	0.000136
P0CX29|RS23A_YEAST(114)-P0CX29|RS23A_YEAST(123),P0CX30|RS23B_YEAST(114)-P0CX30|RS23B_YEAST(123)	AKGDIPGVR(2)-FKVVK(2)	7	2.71e-08
Q06106|MRD1_YEAST(363)-Q06106|MRD1_YEAST(357)	KLFSPFGELEEVHVALDTR(1)-NILYTSKEEDFR(7)	7	8.78e-07
P10591|HSP71_YEAST(504)-P10591|HSP71_YEAST(509),P10592|HSP72_YEAST(504)-P10592|HSP72_YEAST(509)	ITITNDKGR(7)-LSKEDIEK(3)	7	5.11e-06
P0CX47|RS11A_YEAST(141)-P0CX47|RS11A_YEAST(151),P0CX48|RS11B_YEAST(141)-P0CX48|RS11B_YEAST(151)	FNVVKVSAAAGK(5)-ANKQFAK(3)	7	1.72e-05
P04147|PABP_YEAST(105)-P04147|PABP_YEAST(400)	AIEQLNYTPIKGR(11)-KDVR(1)	7	0.000196
Q06506|RRP9_YEAST(146)-Q06506|RRP9_YEAST(536)	LLISEAKQSFTR(7)-EKFR(2)	7	0.000472
P0CX37|RS6A_YEAST(214)-P0CX37|RS6A_YEAST(220),P0CX38|RS6B_YEAST(214)-P0CX38|RS6B_YEAST(220)	EAAAEYAQLLAKR(12)-KAEK(1)	7	0.00337
P38961|RRP8_YEAST(2)-P38961|RRP8_YEAST(14)	ALFNVEGWSIK(1)-TKTVAFDNK(2)	6	2.4e-12
Q12460|NOP56_YEAST(419)-Q12460|NOP56_YEAST(406)	LEFYNTGKPTLK(8)-KQVEQR(1)	6	5e-11
P53914|KRE33_YEAST(694)-P53914|KRE33_YEAST(685)	TNLLKDDVK(5)-VSDKELAK(4)	6	1.2e-07
Q05946|UTP13_YEAST(181)-Q05946|UTP13_YEAST(179)	KCLHTLQEHTSAVR(1)-VWDLVKR(6)	6	2.63e-06
P33201|MRT4_YEAST(204)-P33201|MRT4_YEAST(168)	QALILKQFGIAASEFK(6)-NKFEIPTK(2)	6	6.66e-06
Q04305|UTP15_YEAST(94)-Q04305|UTP15_YEAST(75)	SDGKLLCAGDATGLVSVYDSYNPR(4)-QVIKTFSR(4)	6	1.11e-05
Q05946|UTP13_YEAST(352)-Q05946|UTP13_YEAST(423)	YVGPELNKLALATNSPSLR(8)-YNENSCKFDIYAK(7)	6	2.73e-05
Q04500|UTP14_YEAST(590)-Q04500|UTP14_YEAST(601)	RIYTPGSLESNKDMNELNDHTR(12)-KENKVDESR(1), IYTPGSLESNKDMNELNDHTR(11)-KENKVDESR(1)	6	0.000884
P15646|FBRL_YEAST(109)-P15646|FBRL_YEAST(130)	GKEDLLVTKNMAPGESVYGEK(9)-ISVEEPSKEDGVPPTKVEYR(8), GKEDLLVTKNMAPGESVYGEK(9)-ISVEEPSKEDGVPPTK(8)	5	1.7e-13
P0CX35|RS4A_YEAST(62)-P0CX35|RS4A_YEAST(53),P0CX36|RS4B_YEAST(62)-P0CX36|RS4B_YEAST(53)	EVKAILMQR(3)-LKYALNGR(2)	5	3.67e-12
Q06287|NEP1_YEAST(106)-Q06287|NEP1_YEAST(213)	DISEARPDITHQCLLTLLDSPINKAGK(24)-GKDNFADEYVDEK(2)	5	9.23e-07
Q99207|NOP14_YEAST(212)-Q99207|NOP14_YEAST(219)	AEVMKEVIAK(5)-SKFYK(2)	5	3.59e-06
Q12499|NOP58_YEAST(281)-Q12499|NOP58_YEAST(411)	MKAIAPNLTQLVGELVGAR(2)-TTPKVVR(4)	5	1.31e-05
P20459|IF2A_YEAST(67)-P20459|IF2A_YEAST(61)	VGKNDVAVVLR(3)-SIQKLIR(4)	5	3.63e-05
P26786|RS7A_YEAST(138)-P26786|RS7A_YEAST(148)	ILEDLVFPTEIVGKR(14)-YLVGGNKIQK(7)	5	0.000198
Q06631|BFR2_YEAST(71)-Q06631|BFR2_YEAST(84)	AEKGLELNDPK(3)-YTGVKGSR(5)	5	0.000224
P39744|NOC2_YEAST(653)-P39744|NOC2_YEAST(628)	FLNDVAWNKTPLGSYVAVQR(9)-LNQNSTFIQEKR(11)	4	2.54e-09
P25586|KRR1_YEAST(115)-P25586|KRR1_YEAST(154)	SVPFPQAVKILQDDMACDVIK(9)-LVGPNGNTLKALELLTK(10)	4	2.79e-09
P0CX82|RL19A_YEAST(146)-P0CX82|RL19A_YEAST(153),P0CX83|RL19B_YEAST(146)-P0CX83|RL19B_YEAST(153)	ALVEHIIQAKADAQR(10)-EKALNEEAEAR(2)	4	4.86e-09
O13516|RS9A_YEAST(10)-O13516|RS9A_YEAST(51),P05755|RS9B_YEAST(10)-P05755|RS9B_YEAST(51)	TYSKTYSTPK(4)-ISFQLSKIR(7)	4	8.99e-08
P35194|UTP20_YEAST(27)-P35194|UTP20_YEAST(20)	IDDLKIEPAR(5)-YSSFKAR(5)	4	9.82e-07
P05759|RS27A_YEAST(136)-P05759|RS27A_YEAST(149)	ECSNPTCGAGVFLANHKDR(17)-CHSVYKVNA(6)	4	1.24e-06
Q06506|RRP9_YEAST(350)-Q06506|RRP9_YEAST(430)	TAMLWKIPDETR(6)-KKPIFTER(1)	4	1.53e-06
P02407|RS17A_YEAST(81)-P02407|RS17A_YEAST(72),P14127|RS17B_YEAST(81)-P14127|RS17B_YEAST(72)	KDQYVPEVSALDLSR(1)-GISFKLQEEER(5)	4	5.74e-06
P35194|UTP20_YEAST(958)-P35194|UTP20_YEAST(919)	KPYINDFLSLASER(1)-AEDEKVVMPYVLR(5)	4	6.28e-06
Q06287|NEP1_YEAST(147)-Q06287|NEP1_YEAST(2)	FSGLMVQLLHKLSIR(11)-VEDSR(1)	4	1.48e-05
Q06506|RRP9_YEAST(367)-Q06506|RRP9_YEAST(430)	GGDEPQKLLR(7)-KKPIFTER(1)	4	5.54e-05
Q05022|RRP5_YEAST(1726)-Q05022|RRP5_YEAST(1682)	ATEYVASHESQKADE(12)-KITR(1)	4	5.75e-05
Q04177|UTP5_YEAST(315)-Q04177|UTP5_YEAST(284)	DLLNVSWLQNATMPYFKNLQWR(17)-KIQIVSKDGR(7), DLLNVSWLQNATMPYFKNLQWR(17)-IQIVSKDGR(6)	4	6.28e-05
P36144|RL1D1_YEAST(265)-P36144|RL1D1_YEAST(15)	ENQKNEDLSDIKL(4)-SGLAEKALK(6)	4	0.000102
Q12499|NOP58_YEAST(411)-Q12499|NOP58_YEAST(393)	TTPKVVR(4)-AKVENR(2)	4	0.000228
P25586|KRR1_YEAST(127)-P25586|KRR1_YEAST(102)	ILQDDMACDVIKIGNFVTNK(12)-DLIKLLAR(4)	4	0.000303
P34247|UTP11_YEAST(212)-P34247|UTP11_YEAST(239)	ETQLKQVQQR(5)-IVDSSGKISFK(7)	4	0.00173
P25635|PWP2_YEAST(753)-P25635|PWP2_YEAST(733)	LNEEYLINKVYEAIPIK(9)-EKQFLNALVMAFR(2)	3	3.45e-15
P25635|PWP2_YEAST(46)-P25635|PWP2_YEAST(27)	VSVFDLINNKSFTFEYEHR(10)-QGNITFSDDGKQLLSPVGNR(11)	3	1.03e-14
Q04305|UTP15_YEAST(94)-Q04305|UTP15_YEAST(138)	SDGKLLCAGDATGLVSVYDSYNPR(4)-FHTQDNKILATASDDR(7)	3	5.36e-11
Q99207|NOP14_YEAST(443)-Q99207|NOP14_YEAST(392)	HIIFLSNQNYLKNVQSFK(12)-THDALLDQVKK(10)	3	1.94e-09
P0CX82|RL19A_YEAST(21)-P0CX82|RL19A_YEAST(19),P0CX83|RL19B_YEAST(21)-P0CX83|RL19B_YEAST(19)	KVWLDPNETSEIAQANSR(1)-LAASVVGVGKR(10)	3	2.6e-08
P39744|NOC2_YEAST(653)-P39744|NOC2_YEAST(617)	FLNDVAWNKTPLGSYVAVQR(9)-LSTVVEKLNQNSTFIQEK(7)	3	8.58e-07
P48234|NOL10_YEAST(601)-P48234|NOL10_YEAST(590)	FMNEMKAGTSTSTQR(6)-EKEQSER(2)	3	9.79e-07
P38333|ENP1_YEAST(85)-P38333|ENP1_YEAST(61)	NKQFEAR(2)-KILQLAK(1)	3	1.54e-06
P26783|RS5_YEAST(214)-P26783|RS5_YEAST(222)	KDELER(1)-VAKSNR(3)	3	2.61e-06
P0CX39|RS8A_YEAST(137)-P0CX39|RS8A_YEAST(142),P0CX40|RS8B_YEAST(137)-P0CX40|RS8B_YEAST(142)	SKNAER(2)-KWAAR(1)	3	4.52e-06
Q05022|RRP5_YEAST(1610)-Q05022|RRP5_YEAST(1571)	TILGNALKALPK(8)-AAELFKATAK(6)	3	0.000146
P05737|RL7A_YEAST(70)-P05737|RL7A_YEAST(66)	DAKAAGSYYVEAQHK(3)-NIIQAKR(6)	3	0.000158
Q99207|NOP14_YEAST(122)-Q99207|NOP14_YEAST(115)	DKLLTEEEK(2)-GGVIDKR(6)	3	0.000346
P11484|HSP75_YEAST(521)-P11484|HSP75_YEAST(161),P40150|HSP76_YEAST(521)-P40150|HSP76_YEAST(161)	LSSEEIEKMVNQAEEFK(8)-QATKDAGAISGLNVLR(4)	3	0.000733
Q12754|RRP12_YEAST(772)-Q12754|RRP12_YEAST(684)	LSELKSGSTAVAQFISDIENVMVDSASSVQTSAK(5)-ITSKEDLEK(4)	3	0.00137
P26786|RS7A_YEAST(179)-P26786|RS7A_YEAST(101)	LTGKQIVFEIPSETH(4)-ILPKPSR(4)	3	0.00222
Q12159|YRA1_YEAST(70)-Q12159|YRA1_YEAST(56)	VAKLLDTTR(3)-KNTR(1)	3	0.00773
P0CX31|RS24A_YEAST(52)-P0CX31|RS24A_YEAST(21),P0CX32|RS24B_YEAST(52)-P0CX32|RS24B_YEAST(21)	LAEVYKAEKDAVSVFGFR(9)-KQFVVDVLHPNR(1)	2	4.01e-12
P04147|PABP_YEAST(504)-P04147|PABP_YEAST(515)	NANDNNQFYQQKQR(12)-QALGEQLYKK(9)	2	1.96e-05
P53914|KRE33_YEAST(685)-P53914|KRE33_YEAST(680)	VSDKELAK(4)-DYSIKR(5)	2	0.000267
P53254|UTP22_YEAST(884)-P53254|UTP22_YEAST(1158)	NELKPELEATFLKFTAK(13)-YKNSLILSSR(2)	2	0.000328
P53914|KRE33_YEAST(62)-P53914|KRE33_YEAST(60)	KLLGFTSHR(1)-SVLWAYKK(7)	2	0.000374
P36144|RL1D1_YEAST(61)-P36144|RL1D1_YEAST(2)	IIPLTKYK(6)-VESNDIIK(1)	2	0.000474
Q06506|RRP9_YEAST(139)-Q06506|RRP9_YEAST(531)	YFGDKLLISEAK(5)-IQVVESGKHGK(8)	2	0.000489
P05750|RS3_YEAST(78)-P05750|RS3_YEAST(75)	FKYAPGTIVLYAER(2)-INELTLLVQKR(10)	2	0.000502
Q06679|UTP4_YEAST(415)-Q06679|UTP4_YEAST(459)	IWTMGTDSSTEQNYKLVCK(15)-VFHLQPVGNKLK(10)	2	0.00068
Q12159|YRA1_YEAST(70)-Q12159|YRA1_YEAST(90)	VAKLLDTTR(3)-DIKQDAVR(3)	2	0.00101
Q08096|RCL1_YEAST(217)-Q08096|RCL1_YEAST(213)	VLKNLQCEVNITADVWR(3)-MIDGAKK(6)	2	0.00136
P35194|UTP20_YEAST(2473)-P35194|UTP20_YEAST(2466)	SREKR(4)-KHAR(1)	2	0.00137
Q06679|UTP4_YEAST(667)-Q06679|UTP4_YEAST(718)	IDFDVDFPINKR(11)-IKSTDVQR(2)	2	0.00139
Q12499|NOP58_YEAST(418)-Q12499|NOP58_YEAST(411)	KVEMTEAR(1)-TTPKVVR(4)	2	0.00296
P35194|UTP20_YEAST(202)-P35194|UTP20_YEAST(20)	KCPVSNLR(1)-YSSFKAR(5)	2	0.00409
Q04217|DHR1_YEAST(506)-Q04217|DHR1_YEAST(541)	EMMHDFKLTK(7)-AKLHK(2)	2	0.00417
P07267|CARP_YEAST(403)-P07267|CARP_YEAST(256)	KYYSIYDLGNNAVGLAKAI(17)-FKGDITWLPVR(2)	1	1.43e-17
P25694|CDC48_YEAST(346)-P25694|CDC48_YEAST(246)	VVSQLLTLMDGMKAR(13)-AIGIKPPR(5)	1	6.32e-08
Q06512|NOC4_YEAST(9)-Q06512|NOC4_YEAST(65)	VLLISEIKDIAK(8)-KLFSR(1)	1	4.45e-06
P26786|RS7A_YEAST(138)-P26786|RS7A_YEAST(179)	ILEDLVFPTEIVGKR(14)-LTGKQIVFEIPSETH(4)	1	4.72e-06
P0C0W9|RL11A_YEAST(164)-P0C0W9|RL11A_YEAST(174),Q3E757|RL11B_YEAST(164)-Q3E757|RL11B_YEAST(174)	TTKEDTVSWFKQK(11)-YDADVLDK(8)	1	9.55e-06
P02407|RS17A_YEAST(23)-P02407|RS17A_YEAST(81),P14127|RS17B_YEAST(23)-P14127|RS17B_YEAST(81)	YYPKLTLDFQTNKR(4)-KDQYVPEVSALDLSR(1)	1	2.56e-05
Q05022|RRP5_YEAST(1650)-Q05022|RRP5_YEAST(1681)	SLFEGLVADAPKR(12)-IITKK(4)	1	7.49e-05
Q05022|RRP5_YEAST(1726)-Q05022|RRP5_YEAST(1689)	ATEYVASHESQKADE(12)-QAKFFFNK(3)	1	8.87e-05
Q08096|RCL1_YEAST(1)-Q08096|RCL1_YEAST(7)	MSSSAPKYTTFQGSQNFR(1)-MSSSAPKYTTFQGSQNFR(7)	1	0.000146
P32861|UGPA1_YEAST(280)-P32861|UGPA1_YEAST(388)	ADVKGGTLISYDGQVR(4)-FLPVKTCSDLLLVK(5)	1	0.000233
Q04217|DHR1_YEAST(351)-Q04217|DHR1_YEAST(372)	KEDLDDGLQEAYVPINENSTR(1)-KAFYVEVSR(1)	1	0.000302
P42945|UTP10_YEAST(1109)-P42945|UTP10_YEAST(1107)	KSLESR(1)-SSSEKK(5)	1	0.000317
Q12136|SAS10_YEAST(10)-Q12136|SAS10_YEAST(4)	TKTSEVGDEINPYGLNEVDDFASK(2)-KGSNR(1)	1	0.000382
Q04305|UTP15_YEAST(341)-Q04305|UTP15_YEAST(75)	SSDKENAPASFNK(4)-QVIKTFSR(4)	1	0.000507
Q05022|RRP5_YEAST(1726)-Q05022|RRP5_YEAST(1686)	ATEYVASHESQKADE(12)-KQAKFFFNK(1)	1	0.000526
P25586|KRR1_YEAST(87)-P25586|KRR1_YEAST(2)	KTYDPAIILK(1)-VSTHNR(1)	1	0.000778
Q05022|RRP5_YEAST(1689)-Q05022|RRP5_YEAST(1712)	QAKFFFNK(3)-TIEYVKAK(6)	1	0.00103
P0CX35|RS4A_YEAST(240)-P0CX35|RS4A_YEAST(245),P0CX36|RS4B_YEAST(240)-P0CX36|RS4B_YEAST(245)	LNNVFVIGEQGKPYISLPKGK(19)-GIKLSIAEER(3)	1	0.00104
P0CX37|RS6A_YEAST(214)-P0CX37|RS6A_YEAST(223),P0CX38|RS6B_YEAST(214)-P0CX38|RS6B_YEAST(223)	EAAAEYAQLLAKR(12)-KAEKAEIR(4)	1	0.00135
Q06631|BFR2_YEAST(225)-Q06631|BFR2_YEAST(229)	MDDSEETKR(8)-LLKENEK(3)	1	0.00138
P0C2H8|RL31A_YEAST(61)-P0C2H8|RL31A_YEAST(65)	LAPELNQAIWKR(11)-GVKGVEYR(3)	1	0.0014
P40498|UTP25_YEAST(672)-P40498|UTP25_YEAST(646)	FIGKNAFLGNTDLNISTVR(4)-RYEIKGVK(5)	1	0.00141
Q06679|UTP4_YEAST(667)-Q06679|UTP4_YEAST(624)	IDFDVDFPINKR(11)-NNTDNLPKEWK(8)	1	0.00163
P53941|IMP4_YEAST(28)-P53941|IMP4_YEAST(40)	AQELQDSQLQQKR(12)-QALAQGKPLPK(7)	1	0.00174
Q12159|YRA1_YEAST(70)-Q12159|YRA1_YEAST(70)	VAKLLDTTR(3)-VAKLLDTTR(3)	1	0.00194
P11484|HSP75_YEAST(90)-P11484|HSP75_YEAST(90),P40150|HSP76_YEAST(90)-P40150|HSP76_YEAST(90)	FDDESVQKDMKTWPFK(11)-DMKTWPFK(3)	1	0.00245
P26786|RS7A_YEAST(111)-P26786|RS7A_YEAST(101),P48164|RS7B_YEAST(111)-P48164|RS7B_YEAST(101)	QVQKRPR(4)-ILPKPSR(4)	1	0.00251
Q04177|UTP5_YEAST(377)-Q04177|UTP5_YEAST(473)	HVDDAIKSWER(7)-LKPALAVILLER(2)	1	0.00297
P04147|PABP_YEAST(362)-P04147|PABP_YEAST(400)	SKGFGFVCFSTPEEATK(2)-KDVR(1)	1	0.00304
Q12754|RRP12_YEAST(233)-Q12754|RRP12_YEAST(228)	TKEDINASVMR(2)-QLKAQK(3)	1	0.00319
P38792|RRP4_YEAST(255)-P38792|RRP4_YEAST(235)	DTPSANNSSSIKSTGPTGAVSLNPSITR(12)-KTSQMDLAR(1)	1	0.00389
Q05022|RRP5_YEAST(1650)-Q05022|RRP5_YEAST(1682)	SLFEGLVADAPKR(12)-KITR(1)	1	0.00397
Q02354|UTP6_YEAST(65)-Q02354|UTP6_YEAST(78)	YINYESNVNKLR(10)-ILQVKK(5)	1	0.00415
Q03532|HAS1_YEAST(215)-Q03532|HAS1_YEAST(188)	QIIKILPNEDR(4)-GFVFKNLK(5)	1	0.00421
P15424|MS116_YEAST(375)-P15424|MS116_YEAST(501)	DSNYKAIIFAPTVK(5)-NIVIAKQEK(6)	1	0.00442
P33750|DCA13_YEAST(386)-P33750|DCA13_YEAST(378)	SNVKTTR(4)-SKAWER(2)	1	0.00523
P38882|UTP9_YEAST(2)-P38882|UTP9_YEAST(257)	GSSLDLVASFSHDSTR(1)-LIQSWPVQVKTLK(10)	1	0.00545
Q12159|YRA1_YEAST(165)-Q12159|YRA1_YEAST(172)	LNLIVDPNQRPVKSLADR(13)-IKAMPQK(2)	1	0.00675
P35194|UTP20_YEAST(2462)-P35194|UTP20_YEAST(2466)	AILAVNAPQISADKK(14)-KHAR(1)	1	0.00682
P32598|PP12_YEAST(47)-P32598|PP12_YEAST(40)	SIFIKQPILLELEAPIK(5)-YLCSKAR(5)	1	0.00703
Q06078|UTP21_YEAST(22)-Q06078|UTP21_YEAST(9)	NSKIFSPFR(3)-KVEEDVR(1)	1	0.00778
P0CX31|RS24A_YEAST(21)-P0CX31|RS24A_YEAST(37),P0CX32|RS24B_YEAST(21)-P0CX32|RS24B_YEAST(37)	KQFVVDVLHPNR(1)-ANVSKDELR(5)	1	0.00803
Q12220|UTP12_YEAST(318)-Q12220|UTP12_YEAST(237)	SIKESYSSFILHPFQTIR(3)-LDIENDKMGGK(7)	1	0.00807
Q06631|BFR2_YEAST(233)-Q06631|BFR2_YEAST(225)	ENEKLFNNLFNR(4)-MDDSEETKR(8)	1	0.00889
P53914|KRE33_YEAST(62)-P53914|KRE33_YEAST(76)	KLLGFTSHR(1)-ENKIKK(3)	1	0.0094
Q99216|PNO1_YEAST(213)-Q99216|PNO1_YEAST(208)	TKFAIENATR(2)-IAGKDGK(4)	1	0.00974

## Sheet: Intermolecular
Crosslink	Spectral counts	Prot1	Res1	Prot2	Res2	Consistenty with 90S model
NOP1_299-UTP11_142	152	NOP1	299	UTP11	142	Unknown
EMG1_2-UTP5_473	23	EMG1	2	UTP5	473	Unknown
ENP2_169-KRR1_312	17	ENP2	169	KRR1	312	Unknown
NOP1_299-UTP11_150	2	NOP1	299	UTP11	150	Unknown
NOP58_417-UTP7_109	1	NOP58	417	UTP7	109	Unknown
NAN1_740-UTP8_442	1	NAN1	740	UTP8	442	Unknown
EMG1_109-MPP10_559	1	EMG1	109	MPP10	559	Unknown
RPS16A_14-RRP5_708	2	RPS16A	14	RRP5	708	Unknown
BFR2_273-LCP5_88	270	BFR2	273	LCP5	88	Unassigned
FPR3_48-RPS22A_82	137	FPR3	48	RPS22A	82	Unassigned
EMG1_213-SAS10_435	115	EMG1	213	SAS10	435	Unassigned
UTP14_824-UTP7_307	89	UTP14	824	UTP7	307	Unassigned
EMG1_213-NOP14_74	66	EMG1	213	NOP14	74	Unassigned
CBF5_180-NOP10_18	62	CBF5	180	NOP10	18	Unassigned
FAF1_307-RPS22A_71	37	FAF1	307	RPS22A	71	Unassigned
BFR2_316-LCP5_116	35	BFR2	316	LCP5	116	Unassigned
BOI2_855-RPL1A_39	19	BOI2	855	RPL1A	39	Unassigned
SSB1_58-SSE1_273	17	SSB1	58	SSE1	273	Unassigned
BMS1_1075-PFK2_548	17	BMS1	1075	PFK2	548	Unassigned
RPG1_63-TOM1_1159	15	RPG1	63	TOM1	1159	Unassigned
LCP5_333-RPS9A_51	13	LCP5	333	RPS9A	51	Unassigned
UTP14_266-UTP20_2059	11	UTP14	266	UTP20	2059	Unassigned
FCF2_22-UTP6_431	11	FCF2	22	UTP6	431	Unassigned
FCF2_75-UTP6_65	9	FCF2	75	UTP6	65	Unassigned
NOP56_164-UTP6_290	8	NOP56	164	UTP6	290	Unassigned
FCF2_125-RRP14_189	8	FCF2	125	RRP14	189	Unassigned
BMS1_982-NOP14_741	8	BMS1	982	NOP14	741	Unassigned
TOM1_545-UTP7_307	7	TOM1	545	UTP7	307	Unassigned
RRT14_148-UTP11_202	7	RRT14	148	UTP11	202	Unassigned
RPL36A_1-URA2_864	7	RPL36A	1	URA2	864	Unassigned
PNO1_188-URB2_235	7	PNO1	188	URB2	235	Unassigned
PNO1_144-UTP14_800	7	PNO1	144	UTP14	800	Unassigned
FCF2_156-NOP1_121	7	FCF2	156	NOP1	121	Unassigned
RRP15_1-SEC26_659	6	RRP15	1	SEC26	659	Unassigned
RPL19A_2-RRP9_534	6	RPL19A	2	RRP9	534	Unassigned
PRT1_152-UTP4_580	6	PRT1	152	UTP4	580	Unassigned
NOG1_501-RPL1A_39	6	NOG1	501	RPL1A	39	Unassigned
DIP2_513-NOP7_418	6	DIP2	513	NOP7	418	Unassigned
BUD21_123-NOC4_65	6	BUD21	123	NOC4	65	Unassigned
UTP14_824-UTP7_454	5	UTP14	824	UTP7	454	Unassigned
SCP160_136-TIF4631_762	5	SCP160	136	TIF4631	762	Unassigned
RPL25_21-RPS9A_91	5	RPL25	21	RPS9A	91	Unassigned
RPG1_787-UTP7_528	5	RPG1	787	UTP7	528	Unassigned
ESF1_218-GBP2_190	5	ESF1	218	GBP2	190	Unassigned
ENP1_273-NOP14_268	5	ENP1	273	NOP14	268	Unassigned
DBP10_919-RCL1_32	5	DBP10	919	RCL1	32	Unassigned
BUD21_188-NOP1_299	5	BUD21	188	NOP1	299	Unassigned
RPS18A_48-UTP30_89	4	RPS18A	48	UTP30	89	Unassigned
NAB6_892-RPS4A_62	4	NAB6	892	RPS4A	62	Unassigned
NAB2_427-RCL1_29	4	NAB2	427	RCL1	29	Unassigned
MAK11_334-SEN1_1947	4	MAK11	334	SEN1	1947	Unassigned
LCP5_333-RPS22A_88	4	LCP5	333	RPS22A	88	Unassigned
FCF2_133-NOP1_102	4	FCF2	133	NOP1	102	Unassigned
FAF1_230-RCL1_32	4	FAF1	230	RCL1	32	Unassigned
FAF1_128-RCL1_250	4	FAF1	128	RCL1	250	Unassigned
ERB1_1-RRP6_559	4	ERB1	1	RRP6	559	Unassigned
ENP2_4-KRE33_919	4	ENP2	4	KRE33	919	Unassigned
ECM16_506-HSP104_778	4	ECM16	506	HSP104	778	Unassigned
DIS3_702-UTP20_1596	4	DIS3	702	UTP20	1596	Unassigned
DBP10_155-UTP4_316	4	DBP10	155	UTP4	316	Unassigned
BMS1_1128-FCF2_125	4	BMS1	1128	FCF2	125	Unassigned
BFR2_424-RCL1_32	4	BFR2	424	RCL1	32	Unassigned
RRP5_1650-SUI2_61	3	RRP5	1650	SUI2	61	Unassigned
RPS6A_214-TEF1_316	3	RPS6A	214	TEF1	316	Unassigned
RPL34A_1-UTP20_957	3	RPL34A	1	UTP20	957	Unassigned
RPL1A_39-URB1_957	3	RPL1A	39	URB1	957	Unassigned
RPG1_196-RPO26_70	3	RPG1	196	RPO26	70	Unassigned
RCL1_32-RPL11A_13	3	RCL1	32	RPL11A	13	Unassigned
NOP14_465-UTP20_1940	3	NOP14	465	UTP20	1940	Unassigned
NOP14_115-RCL1_32	3	NOP14	115	RCL1	32	Unassigned
NOP1_102-SAS10_595	3	NOP1	102	SAS10	595	Unassigned
MPP10_295-SEC26_363	3	MPP10	295	SEC26	363	Unassigned
LCP5_331-RPS9A_51	3	LCP5	331	RPS9A	51	Unassigned
FUN12_246-PRT1_152	3	FUN12	246	PRT1	152	Unassigned
DPM1_15-RRP5_441	3	DPM1	15	RRP5	441	Unassigned
BMS1_836-SAS10_524	3	BMS1	836	SAS10	524	Unassigned
UTP6_26-UTP7_20	2	UTP6	26	UTP7	20	Unassigned
UTP21_9-YGR054W_426	2	UTP21	9	YGR054W	426	Unassigned
UTP14_824-UTP7_299	2	UTP14	824	UTP7	299	Unassigned
URB1_1436-UTP25_28	2	URB1	1436	UTP25	28	Unassigned
SSA4_244-SUI3_214	2	SSA4	244	SUI3	214	Unassigned
RRP5_1650-URB1_965	2	RRP5	1650	URB1	965	Unassigned
RRP36_199-SSA1_568	2	RRP36	199	SSA1	568	Unassigned
RRP12_457-ZUO1_126	2	RRP12	457	ZUO1	126	Unassigned
RCL1_1-YEF3_620	2	RCL1	1	YEF3	620	Unassigned
POP3_137-SNM1_100	2	POP3	137	SNM1	100	Unassigned
POP1_637-UTP13_751	2	POP1	637	UTP13	751	Unassigned
PAT1_668-RPL9A_106	2	PAT1	668	RPL9A	106	Unassigned
NOP4_212-RPS22A_71	2	NOP4	212	RPS22A	71	Unassigned
NOC3_364-SOF1_467	2	NOC3	364	SOF1	467	Unassigned
NOC3_320-UTP13_751	2	NOC3	320	UTP13	751	Unassigned
NIP7_41-NOP2_380	2	NIP7	41	NOP2	380	Unassigned
NAT1_660-REX4_239	2	NAT1	660	REX4	239	Unassigned
MPP10_18-RRP8_372	2	MPP10	18	RRP8	372	Unassigned
MAK5_326-RRP3_199	2	MAK5	326	RRP3	199	Unassigned
MAK21_37-UTP21_918	2	MAK21	37	UTP21	918	Unassigned
KEM1_76-TY1B-DR6_1046	2	KEM1	76	TY1B-DR6	1046	Unassigned
HSP60_28-RRP5_379	2	HSP60	28	RRP5	379	Unassigned
HAS1_163-RPS31_48	2	HAS1	163	RPS31	48	Unassigned
FCF1_35-SAS10_600	2	FCF1	35	SAS10	600	Unassigned
FAL1_158-RPS7A_138	2	FAL1	158	RPS7A	138	Unassigned
ERB1_278-UTP18_219	2	ERB1	278	UTP18	219	Unassigned
ENP2_2-KRE33_919	2	ENP2	2	KRE33	919	Unassigned
EMG1_213-SAS10_430	2	EMG1	213	SAS10	430	Unassigned
EMG1_164-RLP24_125	2	EMG1	164	RLP24	125	Unassigned
EFT1_482-RPL19A_1	2	EFT1	482	RPL19A	1	Unassigned
EBP2_313-PAT1_365	2	EBP2	313	PAT1	365	Unassigned
DPM1_19-RRP5_441	2	DPM1	19	RRP5	441	Unassigned
DBP3_1-RPS11A_43	2	DBP3	1	RPS11A	43	Unassigned
CLU1_106-MRD1_425	2	CLU1	106	MRD1	425	Unassigned
CDC48_261-UTP22_217	2	CDC48	261	UTP22	217	Unassigned
BMS1_231-PPN1_2	2	BMS1	231	PPN1	2	Unassigned
UTP10_272-UTP14_710	1	UTP10	272	UTP14	710	Unassigned
URB1_1173-UTP4_459	1	URB1	1173	UTP4	459	Unassigned
TOM1_1159-UTP4_580	1	TOM1	1159	UTP4	580	Unassigned
SSA1_316-UTP10_1	1	SSA1	316	UTP10	1	Unassigned
SOF1_355-URA2_1801	1	SOF1	355	URA2	1801	Unassigned
SGD1_299-UTP6_389	1	SGD1	299	UTP6	389	Unassigned
SET2_675-UTP14_712	1	SET2	675	UTP14	712	Unassigned
SEN1_931-UTP7_543	1	SEN1	931	UTP7	543	Unassigned
SEC27_390-SSE1_571	1	SEC27	390	SSE1	571	Unassigned
SEC24_275-SSA3_249	1	SEC24	275	SSA3	249	Unassigned
RVB1_450-UTP30_9	1	RVB1	450	UTP30	9	Unassigned
RRP8_88-UTP7_188	1	RRP8	88	UTP7	188	Unassigned
RRP8_385-UTP13_533	1	RRP8	385	UTP13	533	Unassigned
RRP8_376-TIF34_330	1	RRP8	376	TIF34	330	Unassigned
RRP5_379-YTM1_270	1	RRP5	379	YTM1	270	Unassigned
RRP5_114-SPT16_502	1	RRP5	114	SPT16	502	Unassigned
RRP36_2-YRA2_141	1	RRP36	2	YRA2	141	Unassigned
RRP3_218-SCP160_1000	1	RRP3	218	SCP160	1000	Unassigned
RRP12_538-UTP21_819	1	RRP12	538	UTP21	819	Unassigned
RPS7A_138-TAE2_541	1	RPS7A	138	TAE2	541	Unassigned
RPS3_223-UTP14_697	1	RPS3	223	UTP14	697	Unassigned
RPS3_194-RRP8_146	1	RPS3	194	RRP8	146	Unassigned
RPS26A_4-UTP20_2466	1	RPS26A	4	UTP20	2466	Unassigned
RPS24A_43-UTP23_11	1	RPS24A	43	UTP23	11	Unassigned
RPS22A_36-SSC1_5	1	RPS22A	36	SSC1	5	Unassigned
RPS18A_1-RRP14_212	1	RPS18A	1	RRP14	212	Unassigned
RPL31A_26-RRP12_951	1	RPL31A	26	RRP12	951	Unassigned
RPL26A_116-UTP13_588	1	RPL26A	116	UTP13	588	Unassigned
RPL25_74-UTP14_209	1	RPL25	74	UTP14	209	Unassigned
RPL23A_2-TOM1_3170	1	RPL23A	2	TOM1	3170	Unassigned
RPL1A_39-VPS70_739	1	RPL1A	39	VPS70	739	Unassigned
RPL1A_39-RPL7A_158	1	RPL1A	39	RPL7A	158	Unassigned
RPL1A_24-RPL25_96	1	RPL1A	24	RPL25	96	Unassigned
RPL19A_43-UTP5_370	1	RPL19A	43	UTP5	370	Unassigned
RPL16A_170-RPS22A_22	1	RPL16A	170	RPS22A	22	Unassigned
RPL16A_170-RPS22A_19	1	RPL16A	170	RPS22A	19	Unassigned
RPL10_169-SSE1_195	1	RPL10	169	SSE1	195	Unassigned
RPG1_360-RPL7A_238	1	RPG1	360	RPL7A	238	Unassigned
ROK1_559-UTP21_819	1	ROK1	559	UTP21	819	Unassigned
RLP7_210-UTP18_219	1	RLP7	210	UTP18	219	Unassigned
RLP24_125-SPT16_474	1	RLP24	125	SPT16	474	Unassigned
RCL1_29-RPA49_103	1	RCL1	29	RPA49	103	Unassigned
RAT1_153-UGP1_5	1	RAT1	153	UGP1	5	Unassigned
POP6_1-RPP1_66	1	POP6	1	RPP1	66	Unassigned
POL5_838-TOM1_2465	1	POL5	838	TOM1	2465	Unassigned
PFK2_938-TIF4631_850	1	PFK2	938	TIF4631	850	Unassigned
PFK1_891-SET2_345	1	PFK1	891	SET2	345	Unassigned
PAB1_105-RPL22A_86	1	PAB1	105	RPL22A	86	Unassigned
NOP9_645-RRP3_224	1	NOP9	645	RRP3	224	Unassigned
NOP9_454-SSB1_58	1	NOP9	454	SSB1	58	Unassigned
NOP58_24-RPC19_1	1	NOP58	24	RPC19	1	Unassigned
NOP56_186-RRB1_489	1	NOP56	186	RRB1	489	Unassigned
NOP4_85-SAS10_537	1	NOP4	85	SAS10	537	Unassigned
NOP4_102-NOP6_184	1	NOP4	102	NOP6	184	Unassigned
NOP2_618-UTP15_411	1	NOP2	618	UTP15	411	Unassigned
NOP14_88-POP3_14	1	NOP14	88	POP3	14	Unassigned
NOP14_608-SAS10_435	1	NOP14	608	SAS10	435	Unassigned
NOP14_608-NOP58_121	1	NOP14	608	NOP58	121	Unassigned
NOP12_50-UTP20_2434	1	NOP12	50	UTP20	2434	Unassigned
NOG1_501-RRP9_122	1	NOG1	501	RRP9	122	Unassigned
NOG1_334-TAE2_906	1	NOG1	334	TAE2	906	Unassigned
NOC4_489-SAS10_429	1	NOC4	489	SAS10	429	Unassigned
NOC4_489-SAS10_422	1	NOC4	489	SAS10	422	Unassigned
NOC2_2-RRP5_1650	1	NOC2	2	RRP5	1650	Unassigned
NOC2_253-NOP1_212	1	NOC2	253	NOP1	212	Unassigned
NOB1_1-RPS31_99	1	NOB1	1	RPS31	99	Unassigned
NIP7_75-SOF1_449	1	NIP7	75	SOF1	449	Unassigned
NAT1_660-NOG1_289	1	NAT1	660	NOG1	289	Unassigned
NAT1_601-UTP11_97	1	NAT1	601	UTP11	97	Unassigned
NAT1_327-NOP4_539	1	NAT1	327	NOP4	539	Unassigned
NAT1_269-RPL3_340	1	NAT1	269	RPL3	340	Unassigned
NAB3_488-RRP5_441	1	NAB3	488	RRP5	441	Unassigned
NAB3_445-RRP43_84	1	NAB3	445	RRP43	84	Unassigned
MSS116_579-RPL1A_39	1	MSS116	579	RPL1A	39	Unassigned
MPD1_125-UTP10_1102	1	MPD1	125	UTP10	1102	Unassigned
MAP2_41-SSB1_539	1	MAP2	41	SSB1	539	Unassigned
MAK11_334-SEN1_1948	1	MAK11	334	SEN1	1948	Unassigned
LOC1_142-RPS27A_20	1	LOC1	142	RPS27A	20	Unassigned
LOC1_140-NOP8_163	1	LOC1	140	NOP8	163	Unassigned
LCP5_88-SSE1_600	1	LCP5	88	SSE1	600	Unassigned
LCP5_331-TOM1_3029	1	LCP5	331	TOM1	3029	Unassigned
LCP5_2-VPS4_215	1	LCP5	2	VPS4	215	Unassigned
LCP5_115-NOP14_129	1	LCP5	115	NOP14	129	Unassigned
KRR1_280-SSE1_656	1	KRR1	280	SSE1	656	Unassigned
KRE33_82-NOP8_163	1	KRE33	82	NOP8	163	Unassigned
KRE33_664-MRD1_129	1	KRE33	664	MRD1	129	Unassigned
KRE33_484-NOP1_299	1	KRE33	484	NOP1	299	Unassigned
KAR2_2-TAE2_652	1	KAR2	2	TAE2	652	Unassigned
JIP5_257-UTP5_273	1	JIP5	257	UTP5	273	Unassigned
IMP4_200-RPF2_53	1	IMP4	200	RPF2	53	Unassigned
IMP4_16-RRT14_45	1	IMP4	16	RRT14	45	Unassigned
IMP4_132-RLP24_91	1	IMP4	132	RLP24	91	Unassigned
IMP3_46-RPL15A_192	1	IMP3	46	RPL15A	192	Unassigned
IMP3_1-NOG2_360	1	IMP3	1	NOG2	360	Unassigned
HTA1_22-HTB1_124	1	HTA1	22	HTB1	124	Unassigned
HRR25_343-RRP5_778	1	HRR25	343	RRP5	778	Unassigned
HRR25_232-PAT1_394	1	HRR25	232	PAT1	394	Unassigned
HAS1_163-RRP7_255	1	HAS1	163	RRP7	255	Unassigned
FUN12_235-RPS7A_83	1	FUN12	235	RPS7A	83	Unassigned
FCF2_1-SCP160_322	1	FCF2	1	SCP160	322	Unassigned
FCF2_197-UTP11_36	1	FCF2	197	UTP11	36	Unassigned
FCF1_35-VPS4_59	1	FCF1	35	VPS4	59	Unassigned
FAL1_362-SEN1_130	1	FAL1	362	SEN1	130	Unassigned
FAF1_301-MAP2_93	1	FAF1	301	MAP2	93	Unassigned
FAF1_2-KRE33_53	1	FAF1	2	KRE33	53	Unassigned
ESF2_196-SET2_172	1	ESF2	196	SET2	172	Unassigned
ENP1_199-NOP14_257	1	ENP1	199	NOP14	257	Unassigned
ENP1_170-RRP12_26	1	ENP1	170	RRP12	26	Unassigned
EMG1_54-PRP43_569	1	EMG1	54	PRP43	569	Unassigned
ELP4_319-NAT1_37	1	ELP4	319	NAT1	37	Unassigned
ELP4_218-UTP22_596	1	ELP4	218	UTP22	596	Unassigned
ELP3_19-RPL26A_108	1	ELP3	19	RPL26A	108	Unassigned
DIS3_34-TOM1_2270	1	DIS3	34	TOM1	2270	Unassigned
DED1_247-RRP43_45	1	DED1	247	RRP43	45	Unassigned
DED1_1-TOM1_2845	1	DED1	1	TOM1	2845	Unassigned
DBP3_179-NOP2_410	1	DBP3	179	NOP2	410	Unassigned
DBP10_981-RRP12_1112	1	DBP10	981	RRP12	1112	Unassigned
DBP10_831-RPL18A_11	1	DBP10	831	RPL18A	11	Unassigned
DBP10_704-DRS1_433	1	DBP10	704	DRS1	433	Unassigned
COP1_284-NOP9_400	1	COP1	284	NOP9	400	Unassigned
CMS1_185-POP4_225	1	CMS1	185	POP4	225	Unassigned
CLU1_790-UTP22_354	1	CLU1	790	UTP22	354	Unassigned
CLU1_740-NAT1_108	1	CLU1	740	NAT1	108	Unassigned
CLU1_165-UTP7_20	1	CLU1	165	UTP7	20	Unassigned
CLU1_115-RPS23A_70	1	CLU1	115	RPS23A	70	Unassigned
CLU1_1045-NAB6_901	1	CLU1	1045	NAB6	901	Unassigned
CKA1_84-UTP21_435	1	CKA1	84	UTP21	435	Unassigned
CIC1_128-DRS1_702	1	CIC1	128	DRS1	702	Unassigned
CDC48_346-FUN12_283	1	CDC48	346	FUN12	283	Unassigned
CDC48_221-NAN1_423	1	CDC48	221	NAN1	423	Unassigned
CDC33_122-PRP43_643	1	CDC33	122	PRP43	643	Unassigned
BUD21_194-UTP4_765	1	BUD21	194	UTP4	765	Unassigned
BRX1_271-RPS6A_214	1	BRX1	271	RPS6A	214	Unassigned
BOI2_921-RAT1_516	1	BOI2	921	RAT1	516	Unassigned
BMS1_2-SSZ1_517	1	BMS1	2	SSZ1	517	Unassigned
BMS1_1123-FCF2_125	1	BMS1	1123	FCF2	125	Unassigned
BFR2_394-FAF1_36	1	BFR2	394	FAF1	36	Unassigned
BFR1_261-FPR4_282	1	BFR1	261	FPR4	282	Unassigned
ATP2_19-CDC33_1	1	ATP2	19	CDC33	1	Unassigned
ATP1_188-NOP2_410	1	ATP1	188	NOP2	410	Unassigned
RPS9A_91-UTP30_15	6	RPS9A	91	UTP30	15	Inconsistent
EMG1_39-RRP5_1650	4	EMG1	39	RRP5	1650	Inconsistent
PWP2_27-UTP20_422	1	PWP2	27	UTP20	422	Inconsistent
NOP58_138-RPS8A_26	1	NOP58	138	RPS8A	26	Inconsistent
IMP3_165-UTP8_484	1	IMP3	165	UTP8	484	Inconsistent
RPS24A_11-RRP9_350	312	RPS24A	11	RRP9	350	Consistent
KRR1_102-RPS14A_92	233	KRR1	102	RPS14A	92	Consistent
PWP2_27-UTP21_730	208	PWP2	27	UTP21	730	Consistent
RPS24A_21-RRP9_122	160	RPS24A	21	RRP9	122	Consistent
UTP18_219-UTP21_288	145	UTP18	219	UTP21	288	Consistent
PWP2_85-UTP21_661	128	PWP2	85	UTP21	661	Consistent
RRP7_2-UTP22_1205	92	RRP7	2	UTP22	1205	Consistent
SOF1_449-UTP7_478	88	SOF1	449	UTP7	478	Consistent
NOP1_299-NOP56_32	88	NOP1	299	NOP56	32	Consistent
RPS4A_245-RRP9_350	72	RPS4A	245	RRP9	350	Consistent
RPS24A_49-RRP9_122	69	RPS24A	49	RRP9	122	Consistent
PWP2_85-UTP21_9	67	PWP2	85	UTP21	9	Consistent
UTP10_1754-UTP20_27	62	UTP10	1754	UTP20	27	Consistent
KRR1_87-RPS14A_2	57	KRR1	87	RPS14A	2	Consistent
RPS22A_36-RPS7A_148	53	RPS22A	36	RPS7A	148	Consistent
RPS13_100-RRP7_255	48	RPS13	100	RRP7	255	Consistent
PWP2_129-UTP21_661	47	PWP2	129	UTP21	661	Consistent
RPS13_43-RRP7_255	45	RPS13	43	RRP7	255	Consistent
RPS23A_70-UTP11_2	39	RPS23A	70	UTP11	2	Consistent
RPS16A_107-UTP21_533	35	RPS16A	107	UTP21	533	Consistent
UTP10_271-UTP21_245	33	UTP10	271	UTP21	245	Consistent
EMG1_2-UTP15_244	33	EMG1	2	UTP15	244	Consistent
EMG1_2-UTP15_243	33	EMG1	2	UTP15	243	Consistent
RPS24A_11-RRP9_114	30	RPS24A	11	RRP9	114	Consistent
RPS23A_70-UTP11_3	28	RPS23A	70	UTP11	3	Consistent
UTP18_418-UTP4_316	26	UTP18	418	UTP4	316	Consistent
RPS6A_131-UTP20_643	25	RPS6A	131	UTP20	643	Consistent
RPS1A_33-UTP22_732	25	RPS1A	33	UTP22	732	Consistent
RPS13_27-RPS7A_76	25	RPS13	27	RPS7A	76	Consistent
KRR1_127-RPS14A_92	25	KRR1	127	RPS14A	92	Consistent
BMS1_1075-UTP11_75	24	BMS1	1075	UTP11	75	Consistent
RPS16A_140-RPS28A_14	22	RPS16A	140	RPS28A	14	Consistent
FCF1_133-NOP1_299	22	FCF1	133	NOP1	299	Consistent
EMG1_177-RPS5_213	21	EMG1	177	RPS5	213	Consistent
UTP10_644-UTP4_561	17	UTP10	644	UTP4	561	Consistent
RPS24A_84-RPS4A_62	16	RPS24A	84	RPS4A	62	Consistent
RPS1A_219-UTP22_1007	15	RPS1A	219	UTP22	1007	Consistent
RPS7A_148-SOF1_143	10	RPS7A	148	SOF1	143	Consistent
RPS4A_53-RRP9_114	10	RPS4A	53	RRP9	114	Consistent
NOP1_229-UTP4_217	10	NOP1	229	UTP4	217	Consistent
RPS4A_168-RPS6A_214	9	RPS4A	168	RPS6A	214	Consistent
RPS28A_4-RPS5_222	8	RPS28A	4	RPS5	222	Consistent
FCF1_35-NOP1_299	8	FCF1	35	NOP1	299	Consistent
FCF1_35-NOP1_168	8	FCF1	35	NOP1	168	Consistent
PWP2_27-UTP21_766	7	PWP2	27	UTP21	766	Consistent
SOF1_449-UTP7_476	5	SOF1	449	UTP7	476	Consistent
RPS24A_11-RPS4A_53	5	RPS24A	11	RPS4A	53	Consistent
RPS13_43-RRP7_244	5	RPS13	43	RRP7	244	Consistent
UTP22_745-UTP7_518	4	UTP22	745	UTP7	518	Consistent
UTP15_341-UTP30_170	4	UTP15	341	UTP30	170	Consistent
NOP1_212-NOP56_164	4	NOP1	212	NOP56	164	Consistent
KRR1_245-RPS13_107	4	KRR1	245	RPS13	107	Consistent
UTP4_371-UTP8_700	3	UTP4	371	UTP8	700	Consistent
UTP10_249-UTP18_219	3	UTP10	249	UTP18	219	Consistent
UTP10_1754-UTP20_36	3	UTP10	1754	UTP20	36	Consistent
RRP7_292-UTP22_1018	3	RRP7	292	UTP22	1018	Consistent
RPS8A_142-UTP20_1245	3	RPS8A	142	UTP20	1245	Consistent
RPS11A_102-UTP20_1646	3	RPS11A	102	UTP20	1646	Consistent
PWP2_129-UTP21_9	3	PWP2	129	UTP21	9	Consistent
PWP2_123-UTP21_9	3	PWP2	123	UTP21	9	Consistent
FCF1_93-RPS9A_92	3	FCF1	93	RPS9A	92	Consistent
DIP2_740-EMG1_213	3	DIP2	740	EMG1	213	Consistent
BMS1_602-RCL1_46	3	BMS1	602	RCL1	46	Consistent
BMS1_1075-UTP11_71	3	BMS1	1075	UTP11	71	Consistent
UTP4_773-UTP8_700	2	UTP4	773	UTP8	700	Consistent
RPS4A_198-UTP20_1596	2	RPS4A	198	UTP20	1596	Consistent
RPS11A_141-RPS4A_198	2	RPS11A	141	RPS4A	198	Consistent
NOP1_168-UTP5_419	2	NOP1	168	UTP5	419	Consistent
IMP3_73-MPP10_459	2	IMP3	73	MPP10	459	Consistent
IMP3_73-IMP4_63	2	IMP3	73	IMP4	63	Consistent
RPS9A_90-RRP9_430	1	RPS9A	90	RRP9	430	Consistent
RPS24A_83-UTP20_27	1	RPS24A	83	UTP20	27	Consistent
RPS14A_49-UTP13_555	1	RPS14A	49	UTP13	555	Consistent
RPS14A_36-RPS1A_55	1	RPS14A	36	RPS1A	55	Consistent
RPS14A_2-UTP13_181	1	RPS14A	2	UTP13	181	Consistent
RPS13_27-RPS7A_157	1	RPS13	27	RPS7A	157	Consistent
NOP58_93-UTP4_217	1	NOP58	93	UTP4	217	Consistent
NAN1_163-UTP10_644	1	NAN1	163	UTP10	644	Consistent
IMP3_73-RPS16A_140	1	IMP3	73	RPS16A	140	Consistent
IMP3_73-MPP10_392	1	IMP3	73	MPP10	392	Consistent
FCF1_112-RPS22A_71	1	FCF1	112	RPS22A	71	Consistent
BMS1_646-RCL1_213	1	BMS1	646	RCL1	213	Consistent
BMS1_610-RCL1_46	1	BMS1	610	RCL1	46	Consistent

## Sheet: Intramolecular
Crosslink	Spectral counts	Prot1	Res1	Prot2	Res2
UTP13_699-UTP13_751	225	UTP13	699	UTP13	751
ECM16_346-ECM16_351	202	ECM16	346	ECM16	351
ENP2_266-ENP2_298	182	ENP2	266	ENP2	298
UTP18_134-UTP18_154	172	UTP18	134	UTP18	154
ECM16_386-ECM16_749	155	ECM16	386	ECM16	749
RRP5_686-RRP5_757	152	RRP5	686	RRP5	757
UTP4_556-UTP4_580	132	UTP4	556	UTP4	580
RRP9_114-RRP9_350	129	RRP9	114	RRP9	350
RPL18A_98-RPL18A_116	110	RPL18A	98	RPL18A	116
RPS13_39-RPS13_43	109	RPS13	39	RPS13	43
POP1_519-POP1_536	107	POP1	519	POP1	536
UTP18_219-UTP18_232	103	UTP18	219	UTP18	232
RPS4A_161-RPS4A_233	103	RPS4A	161	RPS4A	233
RPS24A_21-RPS24A_49	99	RPS24A	21	RPS24A	49
UTP5_392-UTP5_473	97	UTP5	392	UTP5	473
UTP4_561-UTP4_580	91	UTP4	561	UTP4	580
RRP9_114-RRP9_122	88	RRP9	114	RRP9	122
UTP4_556-UTP4_561	86	UTP4	556	UTP4	561
RRP5_1623-RRP5_1664	83	RRP5	1623	RRP5	1664
RRP9_367-RRP9_431	77	RRP9	367	RRP9	431
SSB1_161-SSB1_428	75	SSB1	161	SSB1	428
UTP4_624-UTP4_630	73	UTP4	624	UTP4	630
NOP1_102-NOP1_121	72	NOP1	102	NOP1	121
SAS10_225-SAS10_293	71	SAS10	225	SAS10	293
UTP21_9-UTP21_661	71	UTP21	9	UTP21	661
YRA1_70-YRA1_79	68	YRA1	70	YRA1	79
RPS23A_70-RPS23A_123	68	RPS23A	70	RPS23A	123
KRE33_915-KRE33_919	67	KRE33	915	KRE33	919
IMP3_73-IMP3_91	64	IMP3	73	IMP3	91
PWP2_27-PWP2_85	61	PWP2	27	PWP2	85
IMP4_200-IMP4_207	60	IMP4	200	IMP4	207
MPP10_302-MPP10_309	58	MPP10	302	MPP10	309
SOF1_143-SOF1_210	57	SOF1	143	SOF1	210
UTP30_89-UTP30_170	52	UTP30	89	UTP30	170
RRP5_1169-RRP5_1199	52	RRP5	1169	RRP5	1199
RPS12_50-RPS12_114	50	RPS12	50	RPS12	114
EFT1_2-EFT1_50	49	EFT1	2	EFT1	50
EMG1_158-EMG1_164	48	EMG1	158	EMG1	164
RRP9_122-RRP9_350	47	RRP9	122	RRP9	350
DIP2_230-DIP2_318	45	DIP2	230	DIP2	318
SAS10_506-SAS10_510	44	SAS10	506	SAS10	510
UTP4_59-UTP4_342	44	UTP4	59	UTP4	342
YRA1_70-YRA1_127	43	YRA1	70	YRA1	127
UGP1_280-UGP1_301	43	UGP1	280	UGP1	301
RPS17A_81-RPS17A_116	43	RPS17A	81	RPS17A	116
ECM16_346-ECM16_571	42	ECM16	346	ECM16	571
MPP10_295-MPP10_309	42	MPP10	295	MPP10	309
ECM16_351-ECM16_571	41	ECM16	351	ECM16	571
EMG1_2-EMG1_213	41	EMG1	2	EMG1	213
UTP4_371-UTP4_773	41	UTP4	371	UTP4	773
LCP5_331-LCP5_333	40	LCP5	331	LCP5	333
RPL11A_87-RPL11A_174	40	RPL11A	87	RPL11A	174
RRP12_538-RRP12_546	40	RRP12	538	RRP12	546
FUN12_539-FUN12_552	40	FUN12	539	FUN12	552
UTP9_81-UTP9_83	39	UTP9	81	UTP9	83
RPS8A_142-RPS8A_151	39	RPS8A	142	RPS8A	151
RRP3_199-RRP3_218	37	RRP3	199	RRP3	218
RPS4A_174-RPS4A_198	36	RPS4A	174	RPS4A	198
KRR1_83-KRR1_87	33	KRR1	83	KRR1	87
BMS1_933-BMS1_967	33	BMS1	933	BMS1	967
UTP21_22-UTP21_661	32	UTP21	22	UTP21	661
DIP2_404-DIP2_420	31	DIP2	404	DIP2	420
NOP14_404-NOP14_465	30	NOP14	404	NOP14	465
NOP14_74-NOP14_83	29	NOP14	74	NOP14	83
UTP14_285-UTP14_297	29	UTP14	285	UTP14	297
RRP3_250-RRP3_272	29	RRP3	250	RRP3	272
ECM16_472-ECM16_484	29	ECM16	472	ECM16	484
RPS7A_76-RPS7A_84	29	RPS7A	76	RPS7A	84
BFR2_341-BFR2_394	26	BFR2	341	BFR2	394
SSB1_143-SSB1_161	26	SSB1	143	SSB1	161
UTP20_27-UTP20_202	26	UTP20	27	UTP20	202
UTP30_2-UTP30_265	26	UTP30	2	UTP30	265
GLC7_22-GLC7_97	25	GLC7	22	GLC7	97
RPS22A_36-RPS22A_119	25	RPS22A	36	RPS22A	119
RRP5_660-RRP5_686	25	RRP5	660	RRP5	686
DIP2_877-DIP2_884	25	DIP2	877	DIP2	884
RPS4A_155-RPS4A_198	24	RPS4A	155	RPS4A	198
UTP15_253-UTP15_297	24	UTP15	253	UTP15	297
UTP20_2054-UTP20_2059	24	UTP20	2054	UTP20	2059
ECM16_1018-ECM16_1043	23	ECM16	1018	ECM16	1043
KRE33_484-KRE33_498	23	KRE33	484	KRE33	498
RRP7_278-RRP7_285	23	RRP7	278	RRP7	285
SAS10_238-SAS10_247	22	SAS10	238	SAS10	247
POP1_679-POP1_688	22	POP1	679	POP1	688
RPS17A_63-RPS17A_81	21	RPS17A	63	RPS17A	81
PWP2_557-PWP2_572	21	PWP2	557	PWP2	572
UTP6_283-UTP6_290	21	UTP6	283	UTP6	290
RRP5_114-RRP5_399	20	RRP5	114	RRP5	399
EMG1_2-EMG1_109	19	EMG1	2	EMG1	109
EMG1_2-EMG1_12	19	EMG1	2	EMG1	12
UTP4_371-UTP4_765	18	UTP4	371	UTP4	765
EFT1_2-EFT1_61	17	EFT1	2	EFT1	61
RPL22A_2-RPL22A_99	17	RPL22A	2	RPL22A	99
UTP10_149-UTP10_172	17	UTP10	149	UTP10	172
RPS22A_19-RPS22A_71	17	RPS22A	19	RPS22A	71
UTP5_407-UTP5_473	17	UTP5	407	UTP5	473
IMP4_33-IMP4_63	17	IMP4	33	IMP4	63
RRP5_8-RRP5_22	16	RRP5	8	RRP5	22
RPS6A_214-RPS6A_235	16	RPS6A	214	RPS6A	235
DIP2_884-DIP2_892	16	DIP2	884	DIP2	892
BMS1_940-BMS1_982	16	BMS1	940	BMS1	982
RPS11A_43-RPS11A_141	15	RPS11A	43	RPS11A	141
RPS24A_11-RPS24A_21	15	RPS24A	11	RPS24A	21
ECM16_2-ECM16_11	14	ECM16	2	ECM16	11
KRE33_819-KRE33_840	14	KRE33	819	KRE33	840
RRP9_122-RRP9_139	14	RRP9	122	RRP9	139
RRP9_367-RRP9_374	14	RRP9	367	RRP9	374
PNO1_93-PNO1_144	13	PNO1	93	PNO1	144
UTP10_1712-UTP10_1754	13	UTP10	1712	UTP10	1754
BMS1_632-BMS1_646	13	BMS1	632	BMS1	646
UTP25_230-UTP25_299	12	UTP25	230	UTP25	299
RRP9_91-RRP9_350	12	RRP9	91	RRP9	350
SSA1_316-SSA1_322	11	SSA1	316	SSA1	322
YRA1_79-YRA1_90	11	YRA1	79	YRA1	90
ENP1_199-ENP1_212	11	ENP1	199	ENP1	212
NOP1_85-NOP1_121	11	NOP1	85	NOP1	121
SAS10_537-SAS10_548	10	SAS10	537	SAS10	548
ENP1_419-ENP1_450	10	ENP1	419	ENP1	450
UTP22_154-UTP22_166	10	UTP22	154	UTP22	166
UTP4_54-UTP4_197	10	UTP4	54	UTP4	197
UTP4_765-UTP4_773	10	UTP4	765	UTP4	773
PNO1_86-PNO1_93	10	PNO1	86	PNO1	93
RPS7A_44-RPS7A_101	10	RPS7A	44	RPS7A	101
POP1_316-POP1_388	9	POP1	316	POP1	388
EMG1_36-EMG1_109	9	EMG1	36	EMG1	109
EMG1_147-EMG1_158	9	EMG1	147	EMG1	158
UTP7_20-UTP7_346	9	UTP7	20	UTP7	346
RPS7A_148-RPS7A_179	9	RPS7A	148	RPS7A	179
UTP21_794-UTP21_819	9	UTP21	794	UTP21	819
EMG1_12-EMG1_109	9	EMG1	12	EMG1	109
RPL7A_53-RPL7A_66	8	RPL7A	53	RPL7A	66
ECM16_2-ECM16_29	8	ECM16	2	ECM16	29
SSB1_58-SSB1_73	8	SSB1	58	SSB1	73
CDC31_116-CDC31_123	8	CDC31	116	CDC31	123
LCP5_234-LCP5_239	8	LCP5	234	LCP5	239
UTP21_795-UTP21_806	8	UTP21	795	UTP21	806
PAB1_105-PAB1_400	7	PAB1	105	PAB1	400
MRD1_357-MRD1_363	7	MRD1	357	MRD1	363
SSA1_504-SSA1_509	7	SSA1	504	SSA1	509
RPS23A_114-RPS23A_123	7	RPS23A	114	RPS23A	123
RRP9_146-RRP9_536	7	RRP9	146	RRP9	536
RPS6A_214-RPS6A_220	7	RPS6A	214	RPS6A	220
RPS11A_141-RPS11A_151	7	RPS11A	141	RPS11A	151
UTP14_590-UTP14_601	6	UTP14	590	UTP14	601
RRP8_2-RRP8_14	6	RRP8	2	RRP8	14
MRT4_168-MRT4_204	6	MRT4	168	MRT4	204
KRE33_685-KRE33_694	6	KRE33	685	KRE33	694
UTP15_75-UTP15_94	6	UTP15	75	UTP15	94
NOP56_406-NOP56_419	6	NOP56	406	NOP56	419
UTP13_352-UTP13_423	6	UTP13	352	UTP13	423
UTP13_179-UTP13_181	6	UTP13	179	UTP13	181
NOP14_212-NOP14_219	5	NOP14	212	NOP14	219
BFR2_71-BFR2_84	5	BFR2	71	BFR2	84
SUI2_61-SUI2_67	5	SUI2	61	SUI2	67
RPS7A_138-RPS7A_148	5	RPS7A	138	RPS7A	148
EMG1_106-EMG1_213	5	EMG1	106	EMG1	213
NOP58_281-NOP58_411	5	NOP58	281	NOP58	411
RPS4A_53-RPS4A_62	5	RPS4A	53	RPS4A	62
NOP1_109-NOP1_130	5	NOP1	109	NOP1	130
RPL19A_146-RPL19A_153	4	RPL19A	146	RPL19A	153
RPS17A_72-RPS17A_81	4	RPS17A	72	RPS17A	81
NOC2_628-NOC2_653	4	NOC2	628	NOC2	653
UTP20_919-UTP20_958	4	UTP20	919	UTP20	958
RRP5_1682-RRP5_1726	4	RRP5	1682	RRP5	1726
KRR1_115-KRR1_154	4	KRR1	115	KRR1	154
RPS31_136-RPS31_149	4	RPS31	136	RPS31	149
UTP30_15-UTP30_265	4	UTP30	15	UTP30	265
UTP11_212-UTP11_239	4	UTP11	212	UTP11	239
UTP20_20-UTP20_27	4	UTP20	20	UTP20	27
UTP5_284-UTP5_315	4	UTP5	284	UTP5	315
RRP9_367-RRP9_430	4	RRP9	367	RRP9	430
RRP9_350-RRP9_430	4	RRP9	350	RRP9	430
RPS9A_10-RPS9A_51	4	RPS9A	10	RPS9A	51
KRR1_102-KRR1_127	4	KRR1	102	KRR1	127
EMG1_2-EMG1_147	4	EMG1	2	EMG1	147
NOP58_393-NOP58_411	4	NOP58	393	NOP58	411
RPL7A_66-RPL7A_70	3	RPL7A	66	RPL7A	70
YRA1_56-YRA1_70	3	YRA1	56	YRA1	70
RRP12_684-RRP12_772	3	RRP12	684	RRP12	772
NOP14_392-NOP14_443	3	NOP14	392	NOP14	443
RPL19A_19-RPL19A_21	3	RPL19A	19	RPL19A	21
NOP14_115-NOP14_122	3	NOP14	115	NOP14	122
NOC2_617-NOC2_653	3	NOC2	617	NOC2	653
SSB1_161-SSB1_521	3	SSB1	161	SSB1	521
RPS5_214-RPS5_222	3	RPS5	214	RPS5	222
PWP2_27-PWP2_46	3	PWP2	27	PWP2	46
RPS7A_101-RPS7A_179	3	RPS7A	101	RPS7A	179
ENP1_61-ENP1_85	3	ENP1	61	ENP1	85
RRP5_1571-RRP5_1610	3	RRP5	1571	RRP5	1610
RPS8A_137-RPS8A_142	3	RPS8A	137	RPS8A	142
PWP2_733-PWP2_753	3	PWP2	733	PWP2	753
UTP15_94-UTP15_138	3	UTP15	94	UTP15	138
ENP2_590-ENP2_601	3	ENP2	590	ENP2	601
YRA1_70-YRA1_90	2	YRA1	70	YRA1	90
PAB1_504-PAB1_515	2	PAB1	504	PAB1	515
RPS3_75-RPS3_78	2	RPS3	75	RPS3	78
KRE33_60-KRE33_62	2	KRE33	60	KRE33	62
KRE33_680-KRE33_685	2	KRE33	680	KRE33	685
ECM16_506-ECM16_541	2	ECM16	506	ECM16	541
RCL1_213-RCL1_217	2	RCL1	213	RCL1	217
RPS24A_21-RPS24A_52	2	RPS24A	21	RPS24A	52
UTP4_415-UTP4_459	2	UTP4	415	UTP4	459
UTP20_2466-UTP20_2473	2	UTP20	2466	UTP20	2473
UTP4_667-UTP4_718	2	UTP4	667	UTP4	718
UTP30_2-UTP30_61	2	UTP30	2	UTP30	61
UTP22_884-UTP22_1158	2	UTP22	884	UTP22	1158
RRP9_139-RRP9_531	2	RRP9	139	RRP9	531
NOP58_411-NOP58_418	2	NOP58	411	NOP58	418
UTP20_20-UTP20_202	2	UTP20	20	UTP20	202
BFR2_225-BFR2_229	1	BFR2	225	BFR2	229
YRA1_165-YRA1_172	1	YRA1	165	YRA1	172
RRP12_228-RRP12_233	1	RRP12	228	RRP12	233
UGP1_280-UGP1_388	1	UGP1	280	UGP1	388
GLC7_40-GLC7_47	1	GLC7	40	GLC7	47
KRE33_62-KRE33_76	1	KRE33	62	KRE33	76
RPS17A_23-RPS17A_81	1	RPS17A	23	RPS17A	81
RPL11A_164-RPL11A_174	1	RPL11A	164	RPL11A	174
PAB1_362-PAB1_400	1	PAB1	362	PAB1	400
NOC4_9-NOC4_65	1	NOC4	9	NOC4	65
RPL31A_61-RPL31A_65	1	RPL31A	61	RPL31A	65
SSB1_90-SSB1_90	1	SSB1	90	SSB1	90
ECM16_351-ECM16_372	1	ECM16	351	ECM16	372
HAS1_188-HAS1_215	1	HAS1	188	HAS1	215
YRA1_70-YRA1_70	1	YRA1	70	YRA1	70
SAS10_4-SAS10_10	1	SAS10	4	SAS10	10
PEP4_256-PEP4_403	1	PEP4	256	PEP4	403
UTP25_646-UTP25_672	1	UTP25	646	UTP25	672
MSS116_375-MSS116_501	1	MSS116	375	MSS116	501
BFR2_225-BFR2_233	1	BFR2	225	BFR2	233
RRP4_235-RRP4_255	1	RRP4	235	RRP4	255
CDC48_246-CDC48_346	1	CDC48	246	CDC48	346
UTP15_75-UTP15_341	1	UTP15	75	UTP15	341
RPS7A_101-RPS7A_111	1	RPS7A	101	RPS7A	111
RRP5_1686-RRP5_1726	1	RRP5	1686	RRP5	1726
RPS24A_21-RPS24A_37	1	RPS24A	21	RPS24A	37
RRP5_1689-RRP5_1712	1	RRP5	1689	RRP5	1712
IMP4_28-IMP4_40	1	IMP4	28	IMP4	40
RRP5_1689-RRP5_1726	1	RRP5	1689	RRP5	1726
UTP5_377-UTP5_473	1	UTP5	377	UTP5	473
KRR1_2-KRR1_87	1	KRR1	2	KRR1	87
SOF1_378-SOF1_386	1	SOF1	378	SOF1	386
UTP6_65-UTP6_78	1	UTP6	65	UTP6	78
UTP10_1107-UTP10_1109	1	UTP10	1107	UTP10	1109
UTP21_9-UTP21_22	1	UTP21	9	UTP21	22
RCL1_1-RCL1_7	1	RCL1	1	RCL1	7
RPS6A_214-RPS6A_223	1	RPS6A	214	RPS6A	223
RRP5_1650-RRP5_1681	1	RRP5	1650	RRP5	1681
RPS4A_240-RPS4A_245	1	RPS4A	240	RPS4A	245
PNO1_208-PNO1_213	1	PNO1	208	PNO1	213
UTP9_2-UTP9_257	1	UTP9	2	UTP9	257
UTP20_2462-UTP20_2466	1	UTP20	2462	UTP20	2466
RPS7A_138-RPS7A_179	1	RPS7A	138	RPS7A	179
UTP4_624-UTP4_667	1	UTP4	624	UTP4	667
RRP5_1650-RRP5_1682	1	RRP5	1650	RRP5	1682
DIP2_237-DIP2_318	1	DIP2	237	DIP2	318
